# Supplementary material for: Identification of a Male Sterile Candidate Gene in Lilium x formolongi and Transfer of the Gene to Easter Lily (L. longiflorum) via Hybridization
Source: Frontiers journal article supplement (doi:10.3389/fpls.2022.914671), 2022-06-29
Supplement: Data_Sheet_1.PDF [file Data_Sheet_1.PDF]

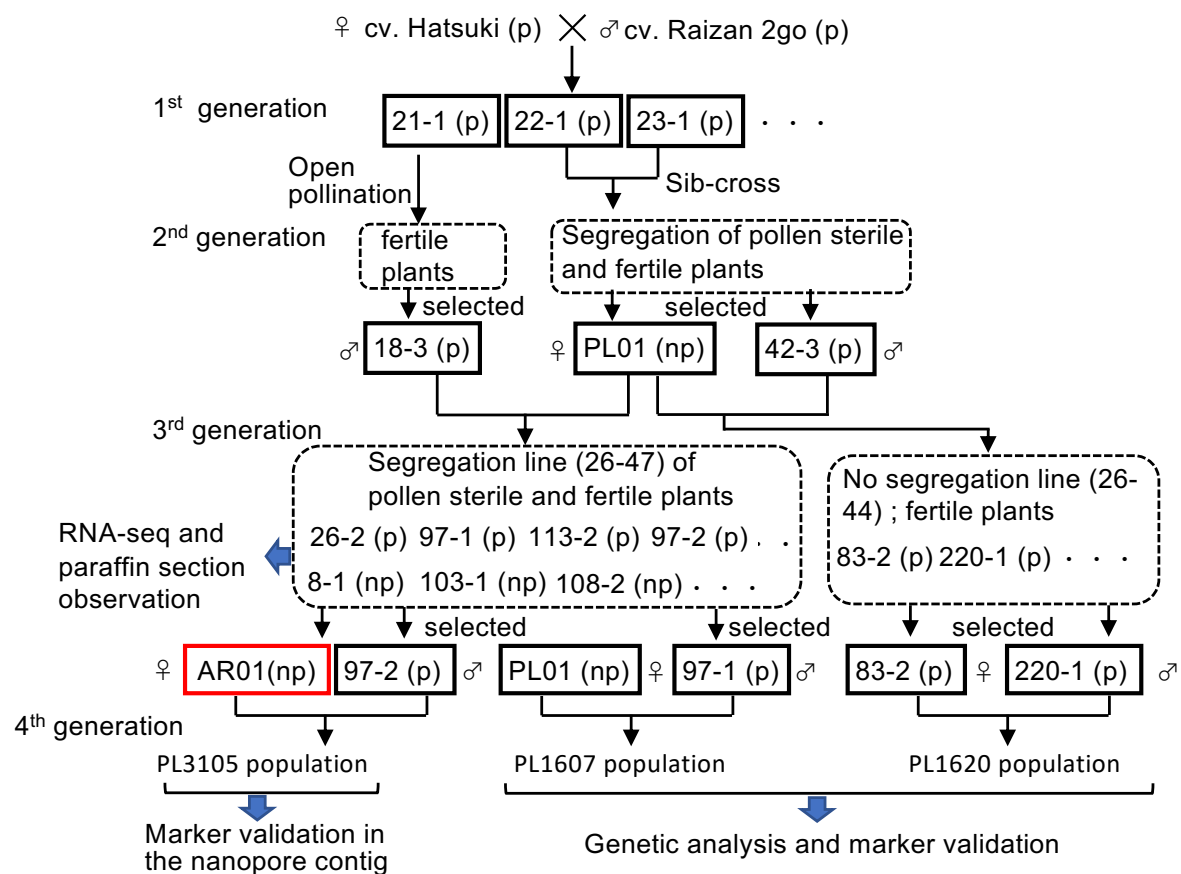

**Supplementary Figure 1** Schematic diagram for development of pollen sterile cv. Akita Kiyohime (AR01) and the experimental materials. (p) and (np) represent pollen fertile and pollen sterile, respectively.
