# Supplementary material for: Identification of a Male Sterile Candidate Gene in Lilium x formolongi and Transfer of the Gene to Easter Lily (L. longiflorum) via Hybridization
Source: Frontiers journal article supplement (doi:10.3389/fpls.2022.914671), 2022-06-29
Supplement: Data_Sheet_2.PDF [file Data_Sheet_2.PDF]

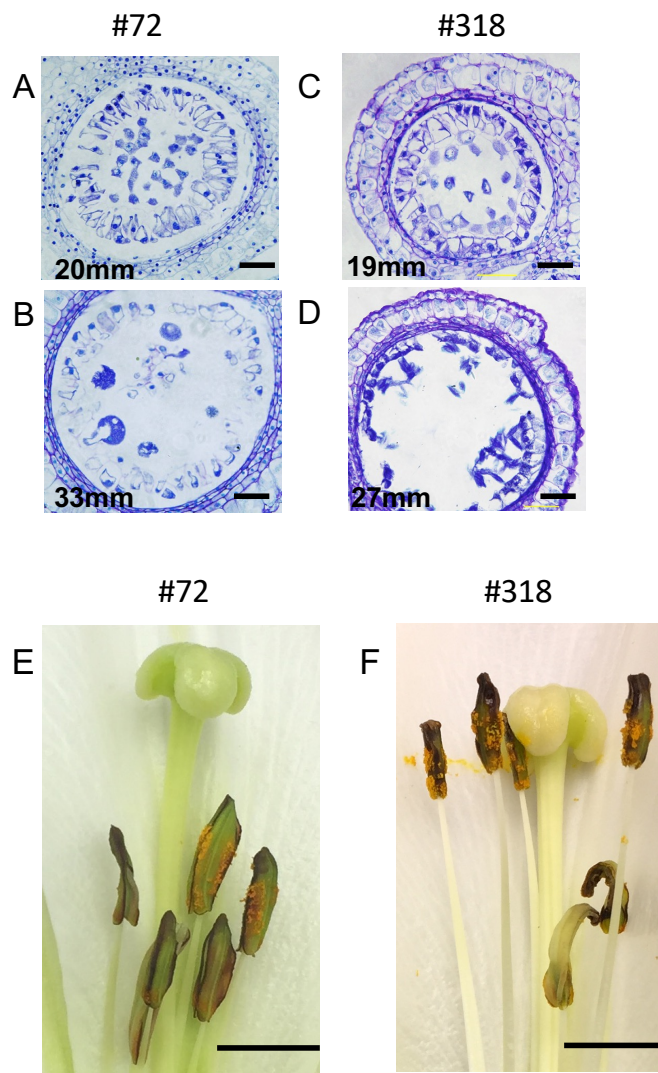

**Supplementary Figure 2** Paraffin section of meiotic stage of the pollen sterile plants developed by *L. × formolongi* mutation breeding. (A, B) Pollen sterile plant, #72; (C, D) Pollen sterile plant, #318. Bae=100μ. Appearance of the anthers of (E) #72 and (F) #318 plants during flowering time. Bae=1 cm
