# Supplementary material for: Identification of a Male Sterile Candidate Gene in Lilium x formolongi and Transfer of the Gene to Easter Lily (L. longiflorum) via Hybridization
Source: Front Plant Sci. 2022 Jun 29;13:914671. doi: 10.3389/fpls.2022.914671 (PMC9277459; doi:10.3389/fpls.2022.914671)
Supplement: Supplementary file 7 [file Table_1.XLSX]

## Sheet: Sheet1
Supplementary Table 1 The sequences of primers used for the experiments
	Primer pair	Primer name	5'-sequence- 3'		Primer name	5'-sequence- 3'
RT-PCR qPCR
	f2r2	LfTDF1- f2	TTGAAGAGGTGTGGAAAGAGCTGCAGG		LfTDF1- r2	TCCTGACTGGAAGATGCTCTTGAGATC
	LhACTIN	LhACTIN-f	GGAGTGAGCCACACAGTTCC		LhACTIN-r	ATAGCTCTTCTCCACAGAGG
Genotyping
	f4r4	LfTDF1- f4	CTCCTCTACTTCAATTTCAAACCC		LfTDF1- r4	ACAGATGTCCAGTTCTTTGTTCC
	f3r3	LfTDF1- f3	ACTCTTACTGCTCCAATCTCTC		LfTDF1- r3	TCTATTGTGTTGTGACACTCAC
	Unigene15801	Unigene15801-f	AAATCATTCCCACCGACGTCCT		Unigene15801-r	AGGGGCAATCAAGACCAGAGTC
DNA sequencing
		LfTDF1-f1	CTGTTACCCTTAAGGGAGCTCATAGAGG
		LfTDF1-r1	AGATCTCATCCACGAATGATCGAGGAG
		tdf1 1f	CTAATTTATCTAGGGAAAATGGGGAGGC
		tdf1 2r	CTGAGATGGACTAATTATCTGAGGCCTA
		tdf1 3r	GTGGAGAGTAAAGTAAAAGGAAACCC
		tdf1 4r	GGTTTACATGTATGAGAGAGAAAGGGAG
		tdf1 5r	CATCATACTCTTACTGCTCCAATCTCTC
Nanopore contig analysis
	Primer pair
	c	nano-2F	CACCAAGGTAAATCCTATTTTGGTGTAG		nano-aR	GGGAAAGGTTCATGTTATAAATAAC
	d	nano-cF	CCAGTTAAGGGCATATAGATGAATC		nano-cR	AGTTTAATTAACCTTGCTACAAGTTGAG
	e	nano-fF	ATGAATTCTAATCCATCATTATGTAATGGG		nano-fR	CATACCCAATGTCTCTAGGATCTTC
	f	nano-nF	GAACATATAGTCAGAGATATACTAGTG		nano-eFrv	CACCGTGTGTATCCAATTAACCC
	g	nano-eF	GGGTTAATTGGATACACACGGTG		nano-eR	GGCAGTAGATCATGTTTTCCCATATCC
	h	nano-kF	CAATGACATGAGGGATCGATC		nano-kR	CATACGTATCCAATATCCATCC
