# Supplementary material for: Identification of a Male Sterile Candidate Gene in Lilium x formolongi and Transfer of the Gene to Easter Lily (L. longiflorum) via Hybridization
Source: Front Plant Sci. 2022 Jun 29;13:914671. doi: 10.3389/fpls.2022.914671 (PMC9277459; doi:10.3389/fpls.2022.914671)
Supplement: Supplementary file 8 [file Table_2.XLSX]

## Sheet: 253 in total
	Supplementary Table 2 DETs in the anthers (collected from the bud size, 11-14mm) of pollen sterile (np) and fertile (p) plants with the criteria of FDR < 0.05 and |logFC|>10 and best-hit blastx homology search
rank	Loly DETs query	logFC Down-regulated, p>np (n=97); Up-regulated, p<np (n-156）	AT variant	AT locus	AT gene description	The number of AT locus	blastx identity	homolog. length	mismatch	gap	q. start	q. end	s. start	s. end	e-val	score
1	TRINITY_DN75699_c1_g1_i8	-14.9638	AT3G56340.1	AT3G56340	Small ribosomal subunit protein. protein_coding RIBOSOMAL PROTEIN S26E (RPS26E) RIBOSOMAL PROTEIN S26E (RPS26E)	2	90.244	82	8	0	71	316	1	82	1.35e-36	127			AT3G53670	hypothetical protein;(source:Araport11) protein_coding
2	TRINITY_DN73630_c0_g1_i1	14.3701	AT5G47720.4	AT5G47720	Encodes a functional acetoacetyl-CoA thiolase that is functionally redundant with AACT2. Loss-of-function mutants show no apparent growth phenotypes. protein_coding ACETOACETYL-COA THIOLASE 1 (AACT1) ACETOACETYL-COA THIOLASE 1 (AACT1)	2	78.519	405	87	0	180	1394	1	405	0	670			AT5G55720	Pectin lyase-like superfamily protein;(source:Araport11) protein_coding
3	TRINITY_DN71611_c0_g1_i2	14.1028	AT4G02060.2	AT4G02060	Member of the minichromosome maintenance complex, involved in DNA replication initiation. Abundant in proliferating and endocycling tissues. Localized in the nucleus during G1, S and G2 phases of the cell cycle, and are released into the cytoplasmic compartment during mitosis. Binds chromatin. protein_coding PROLIFERA (PRL) (MCM7);PROLIFERA (PRL)	2	84.203	671	105	1	3	2015	47	716	0	1123			AT3G51130	transmembrane protein;(source:Araport11) protein_coding
4	TRINITY_DN69009_c0_g3_i1	-14.0979	AT3G57650.1	AT3G57650	Encodes an endoplasmic reticulum localized protein with lysophosphatidyl acyltransferase activity. protein_coding LYSOPHOSPHATIDYL ACYLTRANSFERASE 2 (LPAT2) LYSOPHOSPHATIDYL ACYLTRANSFERASE 2 (LPAT2)	1	71.667	360	101	1	126	1205	1	359	0	522			AT3G13760	Cysteine/Histidine-rich C1 domain family protein;(source:Araport11) protein_coding
5	TRINITY_DN69432_c0_g1_i1	13.5227	AT2G23140.4	AT2G23140	PUB4 encodes a functional ubiquitin-protein ligase. The gene is expressed in most plant tissues and the protein localizes to the nucleus. PUB4 has been recovered as a second site suppressor from several different genetic screens and from these, it has been inferred to have roles in regulating root development, pollen tapetum development and ROS induced chloroplast	2	53.524	837	368	8	321	2801	1	826	0	805			AT5G59740	UDP-N-acetylglucosamine (UAA) transporter family;(source:Araport11) protein_coding
6	TRINITY_DN66926_c0_g1_i2	-13.3297	AT5G03160.1	AT5G03160	J domain protein localized in ER lumen. Can partially compensate for the growth defect in jem1 scj1 mutant yeast. protein_coding HOMOLOG OF MAMALLIAN P58IPK (P58IPK) HOMOLOG OF MAMALLIAN P58IPK (ATP58IPK);HOMOLOG OF MAMALLIAN P58IPK (P58IPK)	1	69.802	404	121	1	434	1645	38	440	1.66e-159	470			AT4G39420	spatacsin carboxy-terminus protein;(source:Araport11) protein_coding
7	TRINITY_DN72319_c0_g1_i1	13.3236	AT5G26850.4	AT5G26850	Part of a nanodomain complex that tethers PI4K&#945;1 to the plasma membrane. protein_coding EFR3 OF PLANT 4 (EFOP4) EFR3 OF PLANT 4 (EFOP4)	1	49.501	1002	468	15	182	3142	1	979	0	911			AT4G29410	Ribosomal L28e protein family;(source:Araport11) protein_coding
8	TRINITY_DN73312_c0_g1_i7	13.3159	AT1G10950.1	AT1G10950	Encodes an Arabidopsis Transmembrane nine (TMN) protein. Transmembrane nine (TM9) proteins are localized in the secretory pathway of eukaryotic cells and are involved in cell adhesion and phagocytosis. Functions in the deposition of rhamnogalacturonan II and I for cell growth. protein_coding TRANSMEMBRANE NINE 1 (TMN1) TRANSMEMBRANE NINE 1 (TMN1);EN	1	85.461	564	79	2	287	1969	26	589	0	825			AT1G56690	Pentatricopeptide repeat (PPR) superfamily protein;(source:Araport11) protein_coding
9	TRINITY_DN73004_c1_g3_i3	13.2572	AT2G47970.1	AT2G47970	Nuclear pore localization protein NPL4;(source:Araport11) protein_coding	1	66.912	408	131	4	147	1364	2	407	0	561			AT5G07810	SNF2 domain-containing protein / helicase domain-containing protein / HNH endonuclease domain-containing protein;(source:Araport11) protein_coding
10	TRINITY_DN70477_c1_g1_i3	-13.1359	AT3G22200.1	AT3G22200	Genetically redundant with POP3;mediates pollen tube guidance. Double mutants are self sterile; gamma-aminobutyrate transaminase subunit precursor; nuclear gene for mitochondrial product. Encodes gamma-aminobutyrate transaminase that uses pyruvate instead of alpha-ketoglutarate as cosubstrate. Mutations in POP2/HER1 render roots resistant to the inhibitory growth	1	78.355	462	99	1	318	1700	43	504	0	775			AT5G39410	Saccharopine dehydrogenase;(source:Araport11) protein_coding
11	TRINITY_DN69432_c0_g1_i2	-13.0297	AT2G23140.4	AT2G23140	PUB4 encodes a functional ubiquitin-protein ligase. The gene is expressed in most plant tissues and the protein localizes to the nucleus. PUB4 has been recovered as a second site suppressor from several different genetic screens and from these, it has been inferred to have roles in regulating root development, pollen tapetum development and ROS induced chloroplast	2	53.524	837	368	8	294	2774	1	826	0	806			AT1G15030	Encodes a Cysteine-rich peptide (CRP) family protein protein_coding
12	TRINITY_DN72576_c0_g1_i7	12.8283	AT4G33865.1	AT4G33865	Ribosomal protein S14p/S29e family protein;(source:Araport11) protein_coding	1	92.857	56	4	0	297	464	1	56	7.32e-32	111			AT2G09990	Ribosomal protein S5 domain 2-like superfamily protein;(source:Araport11) protein_coding
13	TRINITY_DN67510_c0_g1_i1	12.8127	AT2G40360.2	AT2G40360	Encodes BOP1, an ortholog of Block of cell proliferation (BOP) protein. A T-DNA null allele of the BOP1 gene is lethal, and a 50% decrease in transcript accumulation is sufficient to cause severe developmental defects linked to defective cell division. protein_coding ARABIDOPSIS THALIANA PESCADILLO ORTHOLOG1 (ATPEP1) BLOCK OF CELL PROLIFERATION 1 (BOP1);	1	67.712	638	198	6	355	2259	104	736	0	892			AT4G10440	S-adenosyl-L-methionine-dependent methyltransferases superfamily protein;(source:Araport11) protein_coding
14	TRINITY_DN72185_c0_g4_i8	-12.8087	AT3G07560.1	AT3G07560	Encodes peroxin 13 (PEX13) involved in protein transport into peroxisomes, for example, peroxisomal import of nitric oxide synthase. protein_coding PEROXIN 13 (PEX13) PEROXIN 13 (PEX13);ABERRANT PEROXISOME MORPHOLOGY 2 (APM2)	1	64.035	114	26	4	789	1094	194	304	3.26e-39	145			AT2G23790	calcium uniporter (DUF607);(source:Araport11) protein_coding
15	TRINITY_DN75116_c0_g6_i4	-12.7482	AT5G15450.1	AT5G15450	Encodes a chloroplast-targeted Hsp101 homologue. Functions as a molecular chaperone involved in plastid differentiation mediating internal thylakoid membrane formation and conferring thermotolerance to chloroplasts during heat stress. APG6 is constitutively expressed in the root tips, the organ boundary region, the reproductive tissues of mature plants where pla	1	84.081	936	133	4	265	3060	35	958	0	1587			AT1G55690	Sec14p-like phosphatidylinositol transfer family protein;(source:Araport11) protein_coding
16	TRINITY_DN73363_c1_g2_i3	-12.5981	AT5G02420.1	AT5G02420	cyclin-dependent kinase inhibitor SMR3-like protein;(source:Araport11) protein_coding (SMR3) (SMR3)	1	25.974	77	49	2	1108	890	18	90	8.8	28.5			AT3G15350	G14 enzyme protein_coding
17	TRINITY_DN68643_c0_g1_i1	-12.5962	AT5G39410.1	AT5G39410	Saccharopine dehydrogenase;(source:Araport11) protein_coding	1	67.494	443	140	4	126	1448	9	449	0	572			AT3G20720	amino-terminal region of chorein;(source:Araport11) protein_coding
18	TRINITY_DN74601_c2_g1_i1	12.593	AT1G56310.2	AT1G56310	DEDDy-type 3&#8242; -> 5&#8242; exoribonuclease involved in miRNA degradation. protein_coding ATRIMMER2 (ATRM2) ATRIMMER2 (ATRM2)	1	52.5	560	246	8	238	1902	11	555	0	543			AT4G01860	Transducin family protein / WD-40 repeat family protein;(source:Araport11) protein_coding
19	TRINITY_DN74486_c0_g1_i1	-12.5886	AT3G14120.2	AT3G14120	nuclear pore complex protein;(source:Araport11) protein_coding (NUP107) (NUP107)	1	65.069	939	320	6	329	3142	143	1074	0	1218			AT2G19380	RNA recognition motif (RRM)-containing protein;(source:Araport11) protein_coding
20	TRINITY_DN75329_c0_g1_i6	-12.5438	AT4G39420.3	AT4G39420	spatacsin carboxy-terminus protein;(source:Araport11) protein_coding	1	64.342	1276	430	10	5972	9790	1144	2397	0	1507			AT5G17910	cardiomyopathy-associated protein;(source:Araport11) protein_coding
21	TRINITY_DN73278_c2_g2_i4	12.4247	AT5G54100.1	AT5G54100	SPFH/Band 7/PHB domain-containing membrane-associated protein family;(source:Araport11) protein_coding STOMATIN-LIKE PROTEIN 2 (SLP2) (ATSLP2);STOMATIN-LIKE PROTEIN 2 (SLP2)	1	68.391	174	54	1	2	520	228	401	1.78e-61	202			AT5G61190	putative endonuclease or glycosyl hydrolase with C2H2-type zinc finger domain-containing protein;(source:Araport11) protein_coding
22	TRINITY_DN72288_c0_g3_i1	12.3204	AT4G29410.2	AT4G29410	Ribosomal L28e protein family;(source:Araport11) protein_coding	1	69.93	143	43	0	159	587	1	143	3.36e-70	214			AT5G35570	O-fucosyltransferase family protein;(source:Araport11) protein_coding
23	TRINITY_DN62230_c0_g1_i3	-12.3078	AT2G48150.1	AT2G48150	Encodes glutathione peroxidase. protein_coding GLUTATHIONE PEROXIDASE 4 (GPX4) GLUTATHIONE PEROXIDASE 4 (ATGPX4); (GPXL4);GLUTATHIONE PEROXIDASE 4 (GPX4)	2	72.353	170	44	2	163	672	1	167	4.2e-84	254			AT3G03130	lisH domain-like protein;(source:Araport11) protein_coding
24	TRINITY_DN70645_c7_g1_i1	12.2892	AT1G03330.1	AT1G03330	Small nuclear ribonucleoprotein family protein;(source:Araport11) protein_coding SM-LIKE 2 (LSM2) SM-LIKE 2 (LSM2)	1	92.473	93	7	0	140	418	1	93	6.32e-59	184			AT5G18850	Low-density receptor-like protein;(source:Araport11) protein_coding
25	TRINITY_DN68909_c0_g2_i1	12.2892	AT5G18580.1	AT5G18580	fass mutants have aberrant cell shapes due to defects in arrangement of cortical microtubules. Encodes a protein highly conserved in higher plants and similar in its C-terminal part to B' regulatory subunits of type 2A protein phosphatases. Interacts with an Arabidopsis type A subunit of PP2A in the yeast two-hybrid system. protein_coding FASS 1 (FASS)	1	86.938	467	58	2	165	1565	1	464	0	810			AT3G07470	DUF538 protein protein_coding
26	TRINITY_DN75357_c1_g1_i1	-12.1939	AT1G65430.1	AT1G65430	IBR domain-containing protein;(source:Araport11) protein_coding ARIADNE 8 (ARI8) ARABIDOPSIS ARIADNE 8 (ATARI8);ARIADNE 8 (ARI8)	1	45.513	468	241	7	322	1701	49	510	2.78e-143	435			AT3G30390	Encodes a putative amino acid transporter. protein_coding
27	TRINITY_DN72191_c3_g3_i2	-12.1634	AT5G65360.1	AT5G65360	Histone superfamily protein;(source:Araport11) protein_coding HISTONE 3.1 (H3.1) HISTONE 3.1 (H3.1); (HTR1)	1	89.189	74	8	0	1	222	63	136	3.59e-41	136			AT3G53440	Homeodomain-like superfamily protein;(source:Araport11) protein_coding
28	TRINITY_DN53596_c0_g1_i2	12.0992	AT2G09990.1	AT2G09990	Ribosomal protein S5 domain 2-like superfamily protein;(source:Araport11) protein_coding	1	89.209	139	15	0	154	570	8	146	5.81e-89	259			AT2G47850	Zinc finger C-x8-C-x5-C-x3-H type family protein;(source:Araport11) protein_coding
29	TRINITY_DN62230_c0_g1_i4	12.094	AT2G48150.1	AT2G48150	Encodes glutathione peroxidase. protein_coding GLUTATHIONE PEROXIDASE 4 (GPX4) GLUTATHIONE PEROXIDASE 4 (ATGPX4); (GPXL4);GLUTATHIONE PEROXIDASE 4 (GPX4)	2	72.353	170	44	2	163	672	1	167	9.78e-84	254			AT4G33865	Ribosomal protein S14p/S29e family protein;(source:Araport11) protein_coding
30	TRINITY_DN72240_c3_g1_i7	-12.0565	AT2G44710.4	AT2G44710	RNA-binding (RRM/RBD/RNP motifs) family protein;(source:Araport11) protein_coding	1	43.173	271	150	3	2873	3676	122	391	1.14e-61	226			AT4G28020	tRNA-thr(GGU) m(6)t(6)A37 methyltransferase;(source:Araport11) protein_coding
31	TRINITY_DN72543_c4_g3_i5	12.0442	AT1G14830.1	AT1G14830	Encodes a dynamin-like protein that is involved in mitochondrial morphogenesis and pollen development. Protein is localized as speckles in the cytoplasm, partially co-localizes with mitochondrial markers, cell plate of dividing cells, and the tip of root hairs, root cap cells, and expanding part of trichoblasts. protein_coding DYNAMIN-LIKE 1C (DL1C) ARABID	1	82.764	615	104	2	243	2084	1	614	0	1030			AT3G56250	hypothetical protein;(source:Araport11) protein_coding
32	TRINITY_DN73885_c0_g1_i7	12.0334	AT2G02560.2	AT2G02560	Arabidopsis thaliana homolog of human CAND1 (cullin-associated and neddylation-dissociated). Putative similarity to TBP-interacting protein TIP120. Ubiquitously expressed in plant tissues throughout development. T-DNA insertion mutant plants were completely sterile and resistant to sirtinol and auxin, but not to gibberellins or brassinolide. Displayed development	1	73.901	1046	245	3	211	3348	1	1018	0	1422			AT2G33490	hydroxyproline-rich glycoprotein family protein;(source:Araport11) protein_coding
33	TRINITY_DN70663_c1_g2_i8	12.0199	AT1G43850.2	AT1G43850	Encodes a transcriptional co-regulator of AGAMOUS, that functions with LEUNIG to repress AG in the outer floral whorls. protein_coding SEUSS (SEU) SEUSS (SEU)	4	63.918	388	102	7	1340	2407	301	682	8.16e-147	465			AT3G49650	P-loop containing nucleoside triphosphate hydrolases superfamily protein;(source:Araport11) protein_coding
34	TRINITY_DN66554_c0_g1_i3	-11.997	AT1G03070.3	AT1G03070	Bax inhibitor-1 family protein;(source:Araport11) protein_coding LIFEGUARD 4 (LFG4) (ATLFG4);LIFEGUARD 4 (LFG4)	2	69.484	213	65	0	267	905	35	247	5.74e-92	282			AT1G02180	ferredoxin-like protein;(source:Araport11) protein_coding
35	TRINITY_DN71928_c2_g1_i2	11.9953	AT5G62670.1	AT5G62670	H[+]-ATPase 11;(source:Araport11) protein_coding H(+)-ATPASE 11 (HA11) H(+)-ATPASE 11 (AHA11);H(+)-ATPASE 11 (HA11)	1	86.102	295	40	1	162	1043	662	956	2.06e-154	465			AT5G47790	SMAD/FHA domain-containing protein;(source:Araport11) protein_coding
36	TRINITY_DN71240_c1_g1_i6	11.9953	AT5G66230.1	AT5G66230	Chalcone-flavanone isomerase family protein;(source:Araport11) protein_coding	1	39.937	318	128	13	122	961	1	293	1.72e-32	126			AT3G50150	transmembrane protein, putative (DUF247);(source:Araport11) protein_coding
37	TRINITY_DN75131_c2_g1_i14	11.8892	AT1G02500.2	AT1G02500	encodes a S-adenosylmethionine synthetase. SAM1 is regulated by protein S-nitrosylation. The covalent binding of nitric oxide (NO) to the Cys114 residue inhibits the enzyme activity. protein_coding S-ADENOSYLMETHIONINE SYNTHETASE 1 (SAM1) S-ADENOSYLMETHIONINE SYNTHETASE 1 (SAM1);S-ADENOSYLMETHIONINE SYNTHETASE-1 (SAM-1); (METK1); (AtSAM1); (MAT1)	1	93.367	392	26	0	216	1391	2	393	0	730			AT4G03180	rRNA-processing protein;(source:Araport11) protein_coding
38	TRINITY_DN70989_c0_g2_i5	11.8223	AT1G23580.1	AT1G23580	transmembrane protein, putative (Domain of unknown function DUF220);(source:Araport11) protein_coding	1	25.862	58	38	2	788	627	109	165	3.6	30			AT1G48570	zinc finger (Ran-binding) family protein;(source:Araport11) protein_coding
39	TRINITY_DN70745_c0_g1_i7	-11.8057	AT1G30240.2	AT1G30240	proline-, glutamic acid/leucine-rich protein;(source:Araport11) protein_coding	3	44.746	590	306	6	155	1912	91	664	1.8e-114	370			AT3G11620	alpha/beta-Hydrolases superfamily protein;(source:Araport11) protein_coding
40	TRINITY_DN74392_c7_g2_i1	11.7971	AT5G05340.1	AT5G05340	Encodes a protein with sequence similarity to peroxidases that is involved in lignin biosynthesis. Loss of function mutations show abnormal development of xylem fibers and reduced levels of lignin biosynthetic enxymes. protein_coding PEROXIDASE 52 (PRX52) PEROXIDASE 52 (PRX52)	1	43.902	164	86	3	2840	2367	153	316	1.78e-35	138			AT1G04030	eisosome protein;(source:Araport11) protein_coding
41	TRINITY_DN62576_c0_g1_i2	11.778	AT1G17080.1	AT1G17080	Ribosomal protein L18ae family;(source:Araport11) protein_coding	1	69.474	95	28	1	330	611	60	154	5.9e-19	83.6			AT5G08780	winged-helix DNA-binding transcription factor family protein;(source:Araport11) protein_coding
42	TRINITY_DN70663_c1_g2_i6	11.7651	AT1G43850.2	AT1G43850	Encodes a transcriptional co-regulator of AGAMOUS, that functions with LEUNIG to repress AG in the outer floral whorls. protein_coding SEUSS (SEU) SEUSS (SEU)	4	63.918	388	102	7	1337	2404	301	682	1.47e-147	465			AT2G44820	axoneme-associated protein MST101(2) protein;(source:Araport11) protein_coding
43	TRINITY_DN40060_c0_g1_i3	-11.7587	no hit																AT5G15610	Proteasome component (PCI) domain protein;(source:Araport11) protein_coding
44	TRINITY_DN63016_c0_g2_i2	-11.7587	AT1G19330.1	AT1G19330	Evening-expressed key component of Sin3-HDAC complex, which bind directly to the CIRCADIAN CLOCK ASSOCIATED 1 (CCA1) and PSEUDO-RESPONSE REGULATOR 9 (PRR9) promoters and catalyze histone 3 (H3) deacetylation at the cognate regions to repress expression, allowing the declining phase of their expression at dusk. protein_coding SAP30 FUNCTION-RELATED 2 (AFR2) SAP30	1	66.379	232	73	3	220	906	7	236	4.08e-94	283			AT1G69980	structural polyprotein;(source:Araport11) protein_coding
45	TRINITY_DN74466_c2_g3_i4	11.6644	AT2G22125.1	AT2G22125	Encodes a protein involved in cell elongation in root and anther filaments. Mutants have greater cell volumes in root tissues and have additive phenotypes with other cell expansion mutants such as those carrying mutations in COB, QUI and POM1 loci. POM2/CSI1 promotes Cellulose Synthase and microtubule co-alignment. The mRNA is cell-to-cell mobile. protein_coding	2	71.19	2159	597	11	168	6596	1	2150	0	2793			AT3G61080	Protein kinase superfamily protein;(source:Araport11) protein_coding
46	TRINITY_DN70663_c1_g2_i2	-11.6599	AT1G43850.2	AT1G43850	Encodes a transcriptional co-regulator of AGAMOUS, that functions with LEUNIG to repress AG in the outer floral whorls. protein_coding SEUSS (SEU) SEUSS (SEU)	4	63.918	388	102	7	1340	2407	301	682	1.19e-147	465			AT3G59910	Ankyrin repeat family protein;(source:Araport11) protein_coding
47	TRINITY_DN73921_c3_g1_i7	11.6469	AT1G65440.3	AT1G65440	Related to yeast Spt6 protein, which functions as part of a protein complex in transcription initiation and also plays a role in chromatin structure / assembly. It encodes a putative WG/GW-repeat protein involved in the regulation of apical-basal polarity of embryo protein_coding GLOBAL TRANSCRIPTION FACTOR GROUP B1 (GTB1) ARABIDOPSIS SUPPRESSOR OF TY I	2	55.459	1264	518	18	664	4368	137	1384	0	1320			AT1G04900	NADH dehydrogenase ubiquinone complex I, assembly factor-like protein (DUF185);(source:Araport11) protein_coding
48	TRINITY_DN75469_c0_g1_i4	-11.6341	AT4G38180.1	AT4G38180	FAR1-related sequence 5;(source:Araport11) protein_coding FAR1-RELATED SEQUENCE 5 (FRS5) FAR1-RELATED SEQUENCE 5 (FRS5)	1	35.182	631	397	6	864	2726	72	700	1.94e-120	389			AT1G07080	Thioredoxin superfamily protein;(source:Araport11) protein_coding
49	TRINITY_DN73210_c0_g3_i10	11.6328	AT2G30530.1	AT2G30530	zinc finger CCCH domain protein;(source:Araport11) protein_coding (MADA4) (MADA4)	2	60	270	94	5	378	1187	93	348	4.67e-78	250			AT5G14050	Transducin/WD40 repeat-like superfamily protein;(source:Araport11) protein_coding
50	TRINITY_DN67491_c0_g1_i2	11.6041	AT2G15230.1	AT2G15230	Lipase active on medium and short chain triacylglycerols, but not on phospho- or galactolipids. Active between pH4 and 7 with an optimum at pH6. Knock-out mutant has not obvious phenotype. Predicted to be extracellular. protein_coding LIPASE 1 (LIP1) LIPASE 1 (ATLIP1);LIPASE 1 (LIP1)	1	64.738	363	124	2	248	1333	27	386	0	515			AT4G15030	folate-sensitive fragile site protein;(source:Araport11) protein_coding
51	TRINITY_DN74868_c0_g1_i3	-11.6041	AT5G23150.2	AT5G23150	Putative transcription factor. Member of the floral homeotic AGAMOUS pathway.Mutations in HUA enhance the phenotype of mild ag-4 allele. Single hua mutants are early flowering and have reduced levels of FLC mRNA. Other MADS box flowering time genes such as FLM and MAF2 also appear to be regulated by HUA2. HUA2 normally activates FLC expression and enhances AG fu	2	50.263	380	150	8	3604	4638	651	1026	4.23e-69	258			AT2G47970	Nuclear pore localization protein NPL4;(source:Araport11) protein_coding
52	TRINITY_DN72487_c2_g1_i1	11.5895	AT5G37590.1	AT5G37590	Tetratricopeptide repeat (TPR)-like superfamily protein;(source:Araport11) protein_coding	1	53.955	493	210	8	315	1763	64	549	1.69e-165	488			AT5G58510	Rab3 GTPase-activating protein catalytic protein;(source:Araport11) protein_coding
53	TRINITY_DN63212_c0_g1_i1	11.5785	AT1G49330.1	AT1G49330	hydroxyproline-rich glycoprotein family protein;(source:Araport11) protein_coding	1	24.051	79	51	3	403	621	252	327	1.2	30.4			AT3G06170	Serinc-domain containing serine and sphingolipid biosynthesis protein;(source:Araport11) protein_coding
54	TRINITY_DN75518_c2_g3_i5	11.5711	AT4G19020.2	AT4G19020	Encodes a plant DNA methyltransferase that methylates mainly cytosines in CHH (H = any base but G) contexts. It is involved in heat tolerance. protein_coding CHROMOMETHYLASE 2 (CMT2) CHROMOMETHYLASE 2 (CMT2)	1	49.526	739	339	16	731	2914	475	1190	0	674			AT2G27285	nuclear speckle splicing regulatory-like protein (DUF2040);(source:Araport11) protein_coding
55	TRINITY_DN74537_c2_g1_i8	-11.5341	AT3G53670.2	AT3G53670	hypothetical protein;(source:Araport11) protein_coding	2	46.939	49	23	2	4496	4642	105	150	0.004	41.2			AT1G30240	proline-, glutamic acid/leucine-rich protein;(source:Araport11) protein_coding
56	TRINITY_DN68380_c0_g2_i1	-11.5221	AT5G58510.1	AT5G58510	Rab3 GTPase-activating protein catalytic protein;(source:Araport11) protein_coding	1	56.065	981	367	12	249	3119	23	963	0	1060			AT5G37590	Tetratricopeptide repeat (TPR)-like superfamily protein;(source:Araport11) protein_coding
57	TRINITY_DN71504_c2_g1_i4	-11.5059	AT5G61790.1	AT5G61790	calnexin 1;(source:Araport11) protein_coding CALNEXIN 1 (CNX1) CALNEXIN 1 (CNX1); (CNX1); (ATCNX1)	1	68.243	296	85	2	1	888	244	530	1.29e-107	330			AT1G22930	T-complex protein 11;(source:Araport11) protein_coding
58	TRINITY_DN74623_c1_g2_i9	-11.4647	AT5G18850.1	AT5G18850	Low-density receptor-like protein;(source:Araport11) protein_coding	2	45.714	35	15	2	125	30	61	94	4.9	29.3			AT3G21215	RNA-binding (RRM/RBD/RNP motifs) family protein;(source:Araport11) protein_coding
59	TRINITY_DN71811_c0_g1_i4	-11.4605	AT2G27035.1	AT2G27035	Has been classified as a stellacyanin. Has also been classified as an early nodulin-like protein (ENODL), because it does not have a His residue involved in Cu binding. ENODLs are proteins having one plastocyanin-like (PCNL) domain lacking the amino acid residues necessary for Cu binding. protein_coding EARLY NODULIN-LIKE PROTEIN 20 (ENODL20) EARLY NODULIN-	1	56.098	41	18	0	16	138	86	126	2.69e-08	53.1			AT1G79740	hAT transposon superfamily;(source:Araport11) protein_coding
60	TRINITY_DN73921_c3_g1_i10	11.4433	AT1G65440.2	AT1G65440	Related to yeast Spt6 protein, which functions as part of a protein complex in transcription initiation and also plays a role in chromatin structure / assembly. It encodes a putative WG/GW-repeat protein involved in the regulation of apical-basal polarity of embryo protein_coding GLOBAL TRANSCRIPTION FACTOR GROUP B1 (GTB1) ARABIDOPSIS SUPPRESSOR OF TY I	2	55.459	1264	518	18	649	4353	166	1413	0	1320			AT2G29210	splicing factor PWI domain-containing protein;(source:Araport11) protein_coding
61	TRINITY_DN70705_c0_g2_i5	11.4433	AT1G04300.1	AT1G04300	Encodes MUSE13, a TRAF domain protein. Regulates the turnover of nucleotide-binding domain and leucine-rich repeat-containing (NLR) immune receptors SNC1 and RPS2. Loss of both MUSE13 and MUSE14 leads to enhanced pathogen resistance, NLR accumulation, and autoimmunity.In addition, MUSE13/14 physically interact with ATG6 and appear to regulate ATG6 ubiquitination a	1	50	884	374	22	208	2760	1	849	0	621			AT2G34190	Xanthine/uracil permease family protein;(source:Araport11) protein_coding
62	TRINITY_DN69823_c0_g4_i2	11.4146	AT5G13480.1	AT5G13480	Encodes a protein with similarity to yeast Pfs2p, an mRNA processing factor. Involved in regulation of flowering time; affects FCA mRNA processing. Homozygous mutants are late flowering, null alleles are embryo lethal. protein_coding (FY) (FY); (WDR33)	1	73.319	461	110	4	334	1695	23	477	0	707			AT4G15010	Mitochondrial substrate carrier family protein;(source:Araport11) protein_coding
63	TRINITY_DN73682_c1_g1_i5	11.4063	AT1G72390.2	AT1G72390	nuclear receptor coactivator;(source:Araport11) protein_coding PHYTOCHROME-DEPENDENT LATE-FLOWERING (PHL) PHYTOCHROME-DEPENDENT LATE-FLOWERING (PHL)	1	37.967	856	440	34	172	2598	1	812	2.59e-126	426			AT4G29250	HXXXD-type acyl-transferase family protein;(source:Araport11) protein_coding
64	TRINITY_DN73041_c2_g2_i3	11.398	AT3G59910.2	AT3G59910	Ankyrin repeat family protein;(source:Araport11) protein_coding	1	72.491	578	149	4	482	2197	37	610	0	816			AT1G22060	sporulation-specific protein;(source:Araport11) protein_coding
65	TRINITY_DN73364_c0_g2_i2	11.3642	AT3G27325.3	AT3G27325	ER localized GPI inositol-deacylase. Involved in GPI-anchor remodeling. protein_coding (PGAP1) (PGAP1)	1	57.942	1108	422	12	282	3578	47	1119	0	1229			AT5G52160	Bifunctional inhibitor/lipid-transfer protein/seed storage 2S albumin superfamily protein;(source:Araport11) protein_coding
66	TRINITY_DN71770_c0_g1_i2	-11.3058	AT4G21530.1	AT4G21530	Transducin/WD40 repeat-like superfamily protein;(source:Araport11) protein_coding ANAPHASE PROMOTING COMPLEX 4 (APC4) ANAPHASE PROMOTING COMPLEX 4 (APC4)	1	59.719	782	291	8	223	2553	3	765	0	894			AT1G49330	hydroxyproline-rich glycoprotein family protein;(source:Araport11) protein_coding
67	TRINITY_DN73210_c0_g3_i2	-11.2964	AT2G30530.1	AT2G30530	zinc finger CCCH domain protein;(source:Araport11) protein_coding (MADA4) (MADA4)	2	59.779	271	95	5	234	1046	92	348	2.3e-78	249			AT5G17900	microfibrillar-associated protein-like protein;(source:Araport11) protein_coding
68	TRINITY_DN73630_c0_g1_i9	11.285	AT5G47720.4	AT5G47720	Encodes a functional acetoacetyl-CoA thiolase that is functionally redundant with AACT2. Loss-of-function mutants show no apparent growth phenotypes. protein_coding ACETOACETYL-COA THIOLASE 1 (AACT1) ACETOACETYL-COA THIOLASE 1 (AACT1)	2	78.519	405	87	0	81	1295	1	405	0	669			AT5G57610	kinase superfamily with octicosapeptide/Phox/Bem1p domain-containing protein;(source:Araport11) protein_coding
69	TRINITY_DN71759_c0_g1_i3	11.2668	AT1G15030.1	AT1G15030	Encodes a Cysteine-rich peptide (CRP) family protein protein_coding	1	26.774	310	145	11	2394	3155	39	322	5.54e-17	85.1			AT1G17080	Ribosomal protein L18ae family;(source:Araport11) protein_coding
70	TRINITY_DN75929_c0_g3_i1	-11.2632	AT3G20500.1	AT3G20500	purple acid phosphatase 18;(source:Araport11) protein_coding PURPLE ACID PHOSPHATASE 18 (PAP18) PURPLE ACID PHOSPHATASE 18 (PAP18);PURPLE ACID PHOSPHATASE 18 (ATPAP18)	1	71.602	412	117	0	301	1536	26	437	0	613			AT2G44710	RNA-binding (RRM/RBD/RNP motifs) family protein;(source:Araport11) protein_coding
71	TRINITY_DN74186_c2_g1_i1	11.2622	AT5G10980.1	AT5G10980	Histone superfamily protein;(source:Araport11) protein_coding HISTONE 3.3 (H3.3) (HTR8);HISTONE 3.3 (H3.3)	1	98.851	87	1	0	63	323	1	87	1.24e-56	172			AT2G42130	Plastid-lipid associated protein PAP / fibrillin family protein;(source:Araport11) protein_coding
72	TRINITY_DN74868_c0_g1_i7	11.2576	AT5G23150.2	AT5G23150	Putative transcription factor. Member of the floral homeotic AGAMOUS pathway.Mutations in HUA enhance the phenotype of mild ag-4 allele. Single hua mutants are early flowering and have reduced levels of FLC mRNA. Other MADS box flowering time genes such as FLM and MAF2 also appear to be regulated by HUA2. HUA2 normally activates FLC expression and enhances AG fu	2	50.263	380	150	8	3604	4638	651	1026	4.3e-69	258			AT1G12460	Leucine-rich repeat protein kinase family protein;(source:Araport11) protein_coding
73	TRINITY_DN65948_c0_g1_i1	11.2484	ATCG00190.1	ATCG00190	Chloroplast DNA-dependent RNA polymerase B subunit. The transcription of this gene is regulated by a nuclear encoded RNA polymerase. This gene has been transferred to mitochondrial genome during crucifer evolution. protein_coding RNA POLYMERASE SUBUNIT BETA (RPOB) RNA POLYMERASE SUBUNIT BETA (RPOB)	1	34.146	41	25	1	652	774	904	942	2.6	34.3			AT1G56290	CwfJ-like family protein;(source:Araport11) protein_coding
74	TRINITY_DN69400_c0_g1_i2	11.2391	AT2G42130.5	AT2G42130	Plastid-lipid associated protein PAP / fibrillin family protein;(source:Araport11) protein_coding	1	61.628	86	33	0	1	258	111	196	1.95e-32	116			AT1G74790	catalytics;(source:Araport11) protein_coding
75	TRINITY_DN74363_c2_g1_i8	-11.2389	AT5G06120.6	AT5G06120	Ran effector. protein_coding (XPO7) (XPO7)	1	74.645	1057	263	2	881	4051	1	1052	0	1635			AT3G26100	Regulator of chromosome condensation (RCC1) family protein;(source:Araport11) protein_coding
76	TRINITY_DN74755_c1_g2_i7	11.225	AT3G23990.1	AT3G23990	mitochondrial chaperonin HSP. assist in rapid assembly of the oligomeric protein structures in the mitochondria. protein_coding HEAT SHOCK PROTEIN 60 (HSP60) HEAT SHOCK PROTEIN 60-3B (HSP60-3B);HEAT SHOCK PROTEIN 60 (HSP60)	1	84.874	357	54	0	155	1225	19	375	0	629			AT5G66230	Chalcone-flavanone isomerase family protein;(source:Araport11) protein_coding
77	TRINITY_DN71734_c3_g4_i7	11.2108	AT5G45240.2	AT5G45240	Disease resistance protein (TIR-NBS-LRR class);(source:Araport11) protein_coding	1	27.66	47	34	0	711	571	711	757	3.3	30.4			AT5G45240	Disease resistance protein (TIR-NBS-LRR class);(source:Araport11) protein_coding
78	TRINITY_DN66834_c0_g1_i2	11.1525	AT3G56130.1	AT3G56130	biotin/lipoyl attachment domain-containing protein;(source:Araport11) protein_coding BCCP-LIKE PROTEIN 3 (BLP3) BCCP-LIKE PROTEIN 3 (BLP3);BIOTIN/LIPOYL ATTACHMENT DOMAIN CONTAINING 1 (BADC1)	1	52.679	224	103	2	414	1082	52	273	1.58e-64	211			AT1G23580	transmembrane protein, putative (Domain of unknown function DUF220);(source:Araport11) protein_coding
79	TRINITY_DN71350_c0_g1_i2	11.1225	AT1G22620.1	AT1G22620	SAC domain phosphoinositide (3,5)P2 phosphatase. Colocalized with a Golgi Marker. Required for normal cell morphogenesis, cell wall synthesis, and actin organization. protein_coding SUPPRESSOR OF ACTIN 1 (SAC1) SUPPRESSOR OF ACTIN 1 (SAC1);SUPPRESSOR OF ACTIN 1 (ATSAC1)	1	67.527	659	200	7	5401	7359	232	882	0	850			AT5G15270	RNA-binding KH domain-containing protein;(source:Araport11) protein_coding (ATKH25) (ATKH25)
80	TRINITY_DN68456_c0_g1_i6	11.1123	AT5G47790.1	AT5G47790	SMAD/FHA domain-containing protein;(source:Araport11) protein_coding	1	61.93	373	101	7	206	1291	1	343	2.33e-152	441			AT5G37370	encodes a putative splicing factor. Over-expression in yeast and Arabidopsis result in increased tolerance to high salt. protein_coding (ATSRL1) (ATSRL1)
81	TRINITY_DN75591_c0_g1_i5	11.1021	AT4G00800.1	AT4G00800	transducin family protein / WD-40 repeat family protein;(source:Araport11) protein_coding (SETH5) VACUOLAR PROTEIN SORTING 8 (VPS8); (SETH5)	1	53.527	1616	684	23	764	5497	315	1901	0	1621			AT2G32900	Homologous to Drosophila ZW10, a centromere/kinetochore protein involved in chromosome segregation. Member of MAG2 complex on the ER that is responsible for efficient transport of seed storage proteins, functions in protein transport between the ER and Golgi apparatus, contain a Zeste?White 10 (ZW10) domain and a Sec39 domain. Required for proper maturation of see
82	TRINITY_DN74008_c0_g2_i1	11.1021	AT1G21730.1	AT1G21730	P-loop containing nucleoside triphosphate hydrolases superfamily protein;(source:Araport11) protein_coding KINESIN 7.1 (KIN7.1) KINESIN 7.1 (KIN7.1)	1	63.039	928	299	11	316	3090	3	889	0	1006			AT3G27550	Mitochondrial protein involved in RNA splicing. Required for normal mitochondrion biogenesis. protein_coding (CFM9) (CFM9)
83	TRINITY_DN74177_c3_g1_i5	11.1021	AT4G18590.1	AT4G18590	Nucleic acid-binding, OB-fold-like protein;(source:Araport11) protein_coding REPLICATION PROTEIN A 3B (RPA3B) REPLICATION PROTEIN A 3B (RPA3B)	2	50.943	106	52	0	579	896	1	106	1e-34	126			AT5G13480	Encodes a protein with similarity to yeast Pfs2p, an mRNA processing factor. Involved in regulation of flowering time; affects FCA mRNA processing. Homozygous mutants are late flowering, null alleles are embryo lethal. protein_coding (FY) (FY); (WDR33)
84	TRINITY_DN70165_c0_g2_i5	11.0814	AT1G68920.3	AT1G68920	basic helix-loop-helix (bHLH) DNA-binding superfamily protein;(source:Araport11) protein_coding CIB1 LIKE PROTEIN 1 (CIL1) (BHLH49);CIB1 LIKE PROTEIN 1 (CIL1)	1	41.296	494	223	17	594	1976	1	460	1.31e-88	290			AT2G25570	SEL1-like repeat protein involved in plasmodesmata-mediated intercellular transport. protein_coding (ISE3) (ISE3)
85	TRINITY_DN72373_c1_g1_i4	11.0814	AT1G79730.1	AT1G79730	Encodes a PAF1 homolog that is involved in the control of flowering time by elevating FLC expression to a level that creates the vernalization-responsive, winter-annual habit. Yeast PAF1 is a component of a five-member complex that associates with RNA pol II and is thought to regulate gene expression by recruiting SET1 (a histone 3 Lys 4 [H3-K4] methyl transferas	1	60.957	397	147	6	873	2054	155	546	3.39e-136	418			AT3G25860	Encodes the dihydrolipoamide S-acetyltransferase subunit of the plastid Pyruvate Dehydrogenase Complex (E2). Mutant has embryo defect. protein_coding (LTA2) PLASTID E2 SUBUNIT OF PYRUVATE DECARBOXYLASE (PLE2); (LTA2)
86	TRINITY_DN71212_c0_g1_i6	11.0762	AT2G20370.1	AT2G20370	Encodes a xyloglucan galactosyltransferase located in the membrane of Golgi stacks that is involved in the biosynthesis of fucose. It is also involved in endomembrane organization. It is suggested that it is a dual-function protein that is responsible for actin organization and the synthesis of cell wall materials. The mRNA is cell-to-cell mobile. protein_coding	1	80.372	484	89	2	446	1879	132	615	0	838			AT2G30530	zinc finger CCCH domain protein;(source:Araport11) protein_coding (MADA4) (MADA4)
87	TRINITY_DN73854_c1_g3_i1	-11.0288	AT5G15350.1	AT5G15350	early nodulin-like protein 17;(source:Araport11) protein_coding EARLY NODULIN-LIKE PROTEIN 17 (ENODL17) (AtENODL17);EARLY NODULIN-LIKE PROTEIN 17 (ENODL17)	1	41.964	112	63	2	194	526	18	128	2.13e-25	101			AT1G04300	Encodes MUSE13, a TRAF domain protein. Regulates the turnover of nucleotide-binding domain and leucine-rich repeat-containing (NLR) immune receptors SNC1 and RPS2. Loss of both MUSE13 and MUSE14 leads to enhanced pathogen resistance, NLR accumulation, and autoimmunity.In addition, MUSE13/14 physically interact with ATG6 and appear to regulate ATG6 ubiquitination a
88	TRINITY_DN74397_c0_g2_i4	11.0284	AT1G56290.1	AT1G56290	CwfJ-like family protein;(source:Araport11) protein_coding	1	52.322	646	280	13	657	2564	65	692	0	592			AT5G59180	Non-catalytic subunit specific to DNA-directed RNA polymerase II; the ortholog of budding yeast RPB7 protein_coding (NRPB7) (NRPB7)
89	TRINITY_DN72707_c1_g1_i12	11.0284	AT2G19380.1	AT2G19380	RNA recognition motif (RRM)-containing protein;(source:Araport11) protein_coding	3	28.655	171	90	6	620	1036	87	257	1.29e-06	52.4			AT3G14120	nuclear pore complex protein;(source:Araport11) protein_coding (NUP107) (NUP107)
90	TRINITY_DN50962_c0_g1_i1	-10.9887	AT4G23160.3	AT4G23160	Encodes a cysteine-rich receptor-like protein kinase. protein_coding CYSTEINE-RICH RLK (RECEPTOR-LIKE PROTEIN KINASE) 8 (CRK8) CYSTEINE-RICH RLK (RECEPTOR-LIKE PROTEIN KINASE) 8 (CRK8)	1	26.623	154	107	2	1006	554	387	537	0.003	40			AT5G65260	RNA-binding (RRM/RBD/RNP motifs) family protein;(source:Araport11) protein_coding (PABN3) (PABN3)
91	TRINITY_DN53500_c0_g1_i2	10.979	AT2G33110.2	AT2G33110	member of VAMP72 Gene Family protein_coding VESICLE-ASSOCIATED MEMBRANE PROTEIN 723 (VAMP723) VESICLE-ASSOCIATED MEMBRANE PROTEIN 723 (ATVAMP723);VESICLE-ASSOCIATED MEMBRANE PROTEIN 723 (VAMP723); (VAMP723)	1	33.333	48	31	1	1278	1418	12	59	3.4	30.4			AT3G27325	ER localized GPI inositol-deacylase. Involved in GPI-anchor remodeling. protein_coding (PGAP1) (PGAP1)
92	TRINITY_DN70386_c0_g1_i2	10.9734	AT5G14600.1	AT5G14600	Part of complex with TRM6, plays a critical role in maintaining the stability of initiator methionyl-tRNA, embryo and endosperm development. In the complex TRM61 functions as the catalytic subunit, and TRM6 performs the role of the binding subunit protein_coding TRNA METHYLTRANSFERASE 61 (TRM61) (ATTRM61);TRNA METHYLTRANSFERASE 61 (TRM61)	1	69.841	315	87	4	420	1340	1	315	1.26e-144	417			AT1G24090	RNase H family protein;(source:Araport11) protein_coding (RNH1C) (RNH1C)
93	TRINITY_DN73621_c2_g5_i2	10.9677	AT4G17840.1	AT4G17840	CAAX protease self-immunity protein;(source:Araport11) protein_coding BALANCE OF CHLOROPHYLL METABOLISM 2 (BCM2) BALANCE OF CHLOROPHYLL METABOLISM 2 (BCM2)	2	71.631	282	80	0	261	1106	141	422	5.78e-145	422			AT4G00800	transducin family protein / WD-40 repeat family protein;(source:Araport11) protein_coding (SETH5) VACUOLAR PROTEIN SORTING 8 (VPS8); (SETH5)
94	TRINITY_DN71148_c3_g9_i1	-10.9534	no hit																AT5G02420	cyclin-dependent kinase inhibitor SMR3-like protein;(source:Araport11) protein_coding (SMR3) (SMR3)
95	TRINITY_DN72214_c0_g2_i16	10.9278	AT2G47850.3	AT2G47850	Zinc finger C-x8-C-x5-C-x3-H type family protein;(source:Araport11) protein_coding	1	52.466	446	181	9	247	1536	2	432	4.03e-126	385			AT2G17930	Component of the SPT module of the SAGA complex. protein_coding (TRA1A) (TRA1A)
96	TRINITY_DN60223_c0_g1_i1	10.9161	AT4G10440.1	AT4G10440	S-adenosyl-L-methionine-dependent methyltransferases superfamily protein;(source:Araport11) protein_coding	1	67.93	633	186	3	75	1952	1	623	0	934			AT3G19770	Guanine nucleotide exchange factor VPS9a. Can activate all Rab5 members to GTP-bound forms in vitro. Required for embryogenesis. Regulates the localization of ARA7 and ARA6. Involved in postembryonic root development. protein_coding (VPS9A) ARABIDOPSIS THALIANA VACUOLAR PROTEIN SORTING 9A (AtVPS9A); (VPS9); (VPS9A)
97	TRINITY_DN73070_c0_g1_i5	10.9161	AT5G11450.2	AT5G11450	PsbP domain protein (Mog1/PsbP/DUF1795-like photosystem II reaction center PsbP family protein);(source:Araport11) protein_coding PSBP DOMAIN PROTEIN 5 (PPD5) PSBP DOMAIN PROTEIN 5 (PPD5)	1	64.372	247	81	3	207	929	70	315	7.43e-113	335			AT5G06120	Ran effector. protein_coding (XPO7) (XPO7)
98	TRINITY_DN71734_c3_g4_i5	10.8985	no hit																AT2G20580	encoding the RPN subunits of the 26S proteasome The mRNA is cell-to-cell mobile. protein_coding 26S PROTEASOME REGULATORY SUBUNIT S2 1A (RPN1A) 26S PROTEASOME REGULATORY SUBUNIT S2 1A (RPN1A);26S PROTEASOME REGULATORY SUBUNIT S2 1A (ATRPN1A)
99	TRINITY_DN75530_c0_g3_i4	-10.8925	AT3G21215.3	AT3G21215	RNA-binding (RRM/RBD/RNP motifs) family protein;(source:Araport11) protein_coding	1	57.143	168	54	1	104	553	1	168	2.38e-55	186			AT5G47720	Encodes a functional acetoacetyl-CoA thiolase that is functionally redundant with AACT2. Loss-of-function mutants show no apparent growth phenotypes. protein_coding ACETOACETYL-COA THIOLASE 1 (AACT1) ACETOACETYL-COA THIOLASE 1 (AACT1)
100	TRINITY_DN70745_c0_g1_i11	-10.8863	AT1G30240.2	AT1G30240	proline-, glutamic acid/leucine-rich protein;(source:Araport11) protein_coding	3	44.308	650	342	6	256	2193	31	664	1.41e-126	405			AT4G21530	Transducin/WD40 repeat-like superfamily protein;(source:Araport11) protein_coding ANAPHASE PROMOTING COMPLEX 4 (APC4) ANAPHASE PROMOTING COMPLEX 4 (APC4)
101	TRINITY_DN73158_c0_g1_i7	10.8807	AT1G21380.1	AT1G21380	Encodes a member of the Arabidopsis TOL (TOM1-LIKE) family of ubiquitin binding proteins that acts redundantly in the recognition and further endocytic sorting of a PIN-FORMED (PIN)-type auxin carrier protein at the plasma membrane, modulating dynamic auxin distribution and associated growth responses. protein_coding TOM1-LIKE 3 (TOL3) TOM1-LIKE 3 (TOL3)	1	68.773	269	82	2	317	1120	9	276	5.04e-135	397			AT2G40360	Encodes BOP1, an ortholog of Block of cell proliferation (BOP) protein. A T-DNA null allele of the BOP1 gene is lethal, and a 50% decrease in transcript accumulation is sufficient to cause severe developmental defects linked to defective cell division. protein_coding ARABIDOPSIS THALIANA PESCADILLO ORTHOLOG1 (ATPEP1) BLOCK OF CELL PROLIFERATION 1 (BOP1);
102	TRINITY_DN69997_c0_g1_i1	10.8807	AT3G06170.1	AT3G06170	Serinc-domain containing serine and sphingolipid biosynthesis protein;(source:Araport11) protein_coding	1	70.602	415	111	5	170	1408	4	409	0	525			AT1G48410	Encodes an RNA Slicer that selectively recruits microRNAs and siRNAs. There is currently no evidence that AGO1 Slicer is in a high molecular weight RNA-induced silencing complex (RISC). Mutants are defective in post-transcriptional gene silencing and have pleiotropic developmental and morphological defects. Through its action on the regulation of ARF17 expressi
103	TRINITY_DN72799_c0_g1_i5	10.8747	AT3G53440.2	AT3G53440	Homeodomain-like superfamily protein;(source:Araport11) protein_coding	1	38.346	266	117	8	1319	2074	260	492	9.25e-41	157			AT1G65430	IBR domain-containing protein;(source:Araport11) protein_coding ARIADNE 8 (ARI8) ARABIDOPSIS ARIADNE 8 (ATARI8);ARIADNE 8 (ARI8)
104	TRINITY_DN75699_c1_g1_i2	10.8747	AT3G56340.1	AT3G56340	Small ribosomal subunit protein. protein_coding RIBOSOMAL PROTEIN S26E (RPS26E) RIBOSOMAL PROTEIN S26E (RPS26E)	2	90.244	82	8	0	71	316	1	82	1.64e-33	127			AT3G48190	Encodes a homolog of the human ATM gene, which is mutated in ataxia telangiectasia, a chromosome instability disorder. Suppresses leaf senescence triggered by DNA double-strand break through epigenetic control of senescence-associated genes. Characterization of mutants suggest a role homologous recombination for DNA damage repair in response to ionizing radiation
105	TRINITY_DN74303_c1_g1_i6	10.8626	AT2G29210.1	AT2G29210	splicing factor PWI domain-containing protein;(source:Araport11) protein_coding	2	55.319	47	18	1	1513	1653	834	877	0.001	43.1			AT3G06650	One of the two genes encoding subunit B of the trimeric enzyme ATP Citrate lyase protein_coding ATP-CITRATE LYASE B-1 (ACLB-1) ATP-CITRATE LYASE B-1 (ACLB-1)
106	TRINITY_DN69123_c0_g1_i3	-10.8483	AT5G52160.1	AT5G52160	Bifunctional inhibitor/lipid-transfer protein/seed storage 2S albumin superfamily protein;(source:Araport11) protein_coding	1	49.206	63	32	0	86	274	33	95	1.79e-14	66.6			AT3G22150	Involved in RNA editing of plastid atpF and mitochondrial nad5. protein_coding ATPF EDITING FACTOR 1 (AEF1) ATPF EDITING FACTOR 1 (AEF1)
107	TRINITY_DN70679_c0_g1_i4	-10.8419	AT3G56250.2	AT3G56250	hypothetical protein;(source:Araport11) protein_coding	1	71.429	28	8	0	554	637	205	232	1.05e-05	47			AT1G56310	DEDDy-type 3&#8242; -> 5&#8242; exoribonuclease involved in miRNA degradation. protein_coding ATRIMMER2 (ATRM2) ATRIMMER2 (ATRM2)
108	TRINITY_DN74623_c1_g2_i14	-10.8419	AT5G58940.4	AT5G58940	Arabidopsis thaliana calmodulin-binding receptor-like kinase mRNA The mRNA is cell-to-cell mobile. protein_coding CALMODULIN-BINDING RECEPTOR-LIKE CYTOPLASMIC KINASE 1 (CRCK1) CALMODULIN-BINDING RECEPTOR-LIKE CYTOPLASMIC KINASE 1 (CRCK1)	2	35.294	68	39	1	683	886	323	385	7.2	30.8			AT4G34700	Encodes the B22 subunit of eukaryotic mitochondrial Complex I. Mutation in the gene display pleiotropic phenotypes including shorter roots, smaller plants and delayed flowering. The mRNA is cell-to-cell mobile. protein_coding B22 SUBUNIT OF EUKARYOTIC MITOCHONDRIAL COMPLEX I (CIB22) B22 SUBUNIT OF EUKARYOTIC MITOCHONDRIAL COMPLEX I (CIB22); (B22); (NDU
109	TRINITY_DN72038_c6_g5_i1	-10.8419	AT5G15610.2	AT5G15610	Proteasome component (PCI) domain protein;(source:Araport11) protein_coding	1	60.117	341	131	2	114	1127	75	413	1.51e-144	428			AT4G17840	CAAX protease self-immunity protein;(source:Araport11) protein_coding BALANCE OF CHLOROPHYLL METABOLISM 2 (BCM2) BALANCE OF CHLOROPHYLL METABOLISM 2 (BCM2)
110	TRINITY_DN68708_c1_g2_i3	10.8382	AT1G74790.1	AT1G74790	catalytics;(source:Araport11) protein_coding	1	62.739	628	223	4	200	2071	27	647	0	820			AT3G56130	biotin/lipoyl attachment domain-containing protein;(source:Araport11) protein_coding BCCP-LIKE PROTEIN 3 (BLP3) BCCP-LIKE PROTEIN 3 (BLP3);BIOTIN/LIPOYL ATTACHMENT DOMAIN CONTAINING 1 (BADC1)
111	TRINITY_DN68794_c0_g2_i2	-10.829	AT4G37280.1	AT4G37280	MRG1 and MRG2 proteins act as readers of H3K4me3/H3K36me3 marked chromatin. They interact with each other and CO to regulate the expression of FT. protein_coding MORF RELATED GENE 1 (MRG1) MORF RELATED GENE 1 (MRG1)	1	56.592	311	129	4	181	1098	2	311	9.39e-105	316			AT5G56870	beta-galactosidase 4;(source:Araport11) protein_coding BETA-GALACTOSIDASE 4 (BGAL4) BETA-GALACTOSIDASE 4 (BGAL4)
112	TRINITY_DN70568_c0_g2_i4	10.8258	AT3G51130.1	AT3G51130	transmembrane protein;(source:Araport11) protein_coding	1	75.505	396	93	2	187	1371	18	410	0	645			AT3G63530	Encodes a novel E3 ubiquitin ligase that acts as a central negative regulator of Arabidopsis floral organ size. Organ size is limited by restricting the period of proliferative growth, rather than the rate of growth and appears to act in a novel pathway, independent of ANT and JAG. Both mRNA and protein are expressed in all actively growing regions of the plant a
113	TRINITY_DN73621_c2_g5_i1	-10.8159	AT4G17840.1	AT4G17840	CAAX protease self-immunity protein;(source:Araport11) protein_coding BALANCE OF CHLOROPHYLL METABOLISM 2 (BCM2) BALANCE OF CHLOROPHYLL METABOLISM 2 (BCM2)	2	71.631	282	80	0	261	1106	141	422	3.42e-145	422			AT5G58940	Arabidopsis thaliana calmodulin-binding receptor-like kinase mRNA The mRNA is cell-to-cell mobile. protein_coding CALMODULIN-BINDING RECEPTOR-LIKE CYTOPLASMIC KINASE 1 (CRCK1) CALMODULIN-BINDING RECEPTOR-LIKE CYTOPLASMIC KINASE 1 (CRCK1)
114	TRINITY_DN75813_c0_g1_i5	10.8007	AT5G58040.2	AT5G58040	Encodes a subunit of the polyadenylation apparatus that interacts with and stimulates the activity of poly(A) polymerase. Additionally , it interacts with several polyadenylation factor subunits and is an RNA-binding protein. It is suggested that this protein coordinates a number of polyadenylation factor subunits with PAP and with RNA. The mRNA is cell-to-cell	1	50.476	315	140	7	828	1769	192	491	3.21e-70	258			AT5G61790	calnexin 1;(source:Araport11) protein_coding CALNEXIN 1 (CNX1) CALNEXIN 1 (CNX1); (CNX1); (ATCNX1)
115	TRINITY_DN74537_c2_g1_i1	10.8007	AT3G53670.2	AT3G53670	hypothetical protein;(source:Araport11) protein_coding	2	46.939	49	23	2	4516	4662	105	150	0.004	41.2			AT5G15450	Encodes a chloroplast-targeted Hsp101 homologue. Functions as a molecular chaperone involved in plastid differentiation mediating internal thylakoid membrane formation and conferring thermotolerance to chloroplasts during heat stress. APG6 is constitutively expressed in the root tips, the organ boundary region, the reproductive tissues of mature plants where pla
116	TRINITY_DN74623_c1_g2_i24	-10.7961	AT5G18850.1	AT5G18850	Low-density receptor-like protein;(source:Araport11) protein_coding	2	45.714	35	15	2	125	30	61	94	4.9	29.3			AT2G22125	Encodes a protein involved in cell elongation in root and anther filaments. Mutants have greater cell volumes in root tissues and have additive phenotypes with other cell expansion mutants such as those carrying mutations in COB, QUI and POM1 loci. POM2/CSI1 promotes Cellulose Synthase and microtubule co-alignment. The mRNA is cell-to-cell mobile. protein_coding
117	TRINITY_DN73329_c3_g4_i5	-10.7961	AT5G02560.1	AT5G02560	Encodes HTA12, a histone H2A protein. protein_coding HISTONE H2A 12 (HTA12) HISTONE H2A 12 (HTA12); (H2A.W.12)	1	82.171	129	19	1	111	485	25	153	4.09e-51	166			AT5G20420	Involved in gene silencing. Locus-specific regulator of 24nt-siRNA expression, works together with CLSY1-4 as the master regulators of essentially all Pol-IV-dependent 24nt-siRNAs. protein_coding CHROMATIN REMODELING 42 (CHR42) CHROMATIN REMODELING 42 (CHR42);CLASSY2 (CLSY2)
118	TRINITY_DN72243_c0_g2_i8	10.7944	AT2G23790.1	AT2G23790	calcium uniporter (DUF607);(source:Araport11) protein_coding	1	57.292	96	40	1	2297	2584	184	278	3.44e-28	117			AT4G19020	Encodes a plant DNA methyltransferase that methylates mainly cytosines in CHH (H = any base but G) contexts. It is involved in heat tolerance. protein_coding CHROMOMETHYLASE 2 (CMT2) CHROMOMETHYLASE 2 (CMT2)
119	TRINITY_DN75494_c6_g3_i3	10.7944	AT4G27585.1	AT4G27585	Encodes a stomatin-like protein that is present in a mitochondrial membrane-bound 3 MDa protein complex and is involved in the assembly of mitochondrial respiratory supercomplexes. There is an observed increase in abundance of respiratory complex III2 in SLP1 single and double knockout mutants. The protein is not redundant with Arabidopsis SLP2 (At5g54100).	1	66.667	357	100	3	519	1574	54	396	8.27e-125	382			AT1G68920	basic helix-loop-helix (bHLH) DNA-binding superfamily protein;(source:Araport11) protein_coding CIB1 LIKE PROTEIN 1 (CIL1) (BHLH49);CIB1 LIKE PROTEIN 1 (CIL1)
120	TRINITY_DN70745_c0_g1_i5	10.7816	AT1G30240.2	AT1G30240	proline-, glutamic acid/leucine-rich protein;(source:Araport11) protein_coding	3	42.415	679	342	7	256	2280	31	664	3.55e-121	391			AT5G50000	Belongs to the Raf-like kinase subfamily of the mitogen-activated protein kinase kinase kinase (MAPKKK) family. Negatively regulates stomatal opening by negatively regulating plasma membrane H+-ATPase phosphorylation. protein_coding CONVERGENCE OF BLUE LIGHT AND CO2 2 (CBC2) CONVERGENCE OF BLUE LIGHT AND CO2 2 (CBC2)
121	TRINITY_DN70042_c0_g1_i5	-10.7761	AT4G15030.1	AT4G15030	folate-sensitive fragile site protein;(source:Araport11) protein_coding	2	79.592	98	20	0	706	999	69	166	8.23e-49	174			AT2G02560	Arabidopsis thaliana homolog of human CAND1 (cullin-associated and neddylation-dissociated). Putative similarity to TBP-interacting protein TIP120. Ubiquitously expressed in plant tissues throughout development. T-DNA insertion mutant plants were completely sterile and resistant to sirtinol and auxin, but not to gibberellins or brassinolide. Displayed development
122	TRINITY_DN70899_c0_g3_i3	10.7752	no hit																AT2G22490	encodes a D-type cyclin whose transcription level is regulated by sucrose but not phytohormones or nitrate. Protein physically interacts with CDC2A. CycD2 kinase activity is regulated by sequestration of CycD2 protein in a form inaccessible to immunoprecipitation and probably not complexed to CDC2A. protein_coding CYCLIN D2;1 (CYCD2;1) CYCLIN D2;1 (CYCD2;1)
123	TRINITY_DN73327_c0_g1_i4	-10.7625	AT1G67120.2	AT1G67120	Represents a homolog of the yeast MDN gene, which encodes a non-ribosomal protein involved in the maturation and assembly of the 60S ribosomal subunit. In Arabidopsis, it is essential for female gametogenesis progression. protein_coding MIDASIN 1 (MDN1) (ATMDN1);MIDASIN 1 (MDN1)	1	43.391	5432	2722	97	211	15975	140	5395	0	3902			AT4G23160	Encodes a cysteine-rich receptor-like protein kinase. protein_coding CYSTEINE-RICH RLK (RECEPTOR-LIKE PROTEIN KINASE) 8 (CRK8) CYSTEINE-RICH RLK (RECEPTOR-LIKE PROTEIN KINASE) 8 (CRK8)
124	TRINITY_DN68169_c0_g1_i3	10.7557	AT4G34700.1	AT4G34700	Encodes the B22 subunit of eukaryotic mitochondrial Complex I. Mutation in the gene display pleiotropic phenotypes including shorter roots, smaller plants and delayed flowering. The mRNA is cell-to-cell mobile. protein_coding B22 SUBUNIT OF EUKARYOTIC MITOCHONDRIAL COMPLEX I (CIB22) B22 SUBUNIT OF EUKARYOTIC MITOCHONDRIAL COMPLEX I (CIB22); (B22); (NDU	1	76.106	113	27	0	44	382	3	115	1.37e-56	182			AT3G28470	Member of the R2R3 factor gene family. Its E-box is critical for the DYT1- bHLH089 heterocomplex to bind to and activate its transcription. protein_coding DEFECTIVE IN MERISTEM DEVELOPMENT AND FUNCTION 1 (TDF1) MYB DOMAIN PROTEIN 35 (AtMYB35); (MYB35);DEFECTIVE IN MERISTEM DEVELOPMENT AND FUNCTION 1 (TDF1)
125	TRINITY_DN72160_c1_g1_i7	10.7492	AT5G37370.1	AT5G37370	encodes a putative splicing factor. Over-expression in yeast and Arabidopsis result in increased tolerance to high salt. protein_coding (ATSRL1) (ATSRL1)	1	79.835	243	49	0	143	871	3	245	1.69e-142	416			AT5G04560	Encodes a DNA glycosylase DEMETER (DME). Responsible for endosperm maternal-allele-specific hypomethylation at the MEDEA (MEA) gene. DME can excise 5-methylcytosine in vitro and when expressed in E. coli. DME establishes MEA imprinting by removing 5-methylcytosine to activate the maternal allele. protein_coding DEMETER (DME) (EMB1649);DEMETER (DME)
126	TRINITY_DN73080_c0_g1_i2	10.7468	AT3G04400.1	AT3G04400	Involved in non-host resistance. protein_coding EMBRYO DEFECTIVE 2171 (emb2171) (RPL23);EMBRYO DEFECTIVE 2171 (emb2171)	1	97.143	140	4	0	43	462	1	140	9.42e-89	277			AT4G28130	diacylglycerol kinase 6;(source:Araport11) protein_coding DIACYLGLYCEROL KINASE 6 (DGK6) (ATDGK6);DIACYLGLYCEROL KINASE 6 (DGK6)
127	TRINITY_DN75391_c0_g2_i1	10.7426	AT2G05990.2	AT2G05990	Encodes enoyl-ACP reductase a component of the fatty acid synthase complex. A reduced function mutation in this gene, mod1, was found in a screen for premature cell death mutants. Mutant plants have reduced lipid level and pleiotropic morphological defects, including chlorotic and abnormally shaped leaves. The mRNA is cell-to-cell mobile. protein_coding MOSAIC	1	23.958	96	68	2	3446	3171	184	278	0.91	34.7			AT1G01040	Encodes a Dicer homolog. Dicer is a RNA helicase involved in microRNA processing. Mutations in this locus can result in embryo lethality. Embryo shape at seed maturity is globular-elongate. Other mutants convert the floral meristems to an indeterminate state, others yet show defects in ovule development. mRNA is expressed in all shoot tissues. DCL1 is able to prod
128	TRINITY_DN69621_c0_g2_i4	-10.7281	AT1G10170.3	AT1G10170	Encodes AtNFXL1, a homologue of the putative human transcription repressor NF-X1. Functions as a negative regulator of the trichothecene phytotoxin-induced defense response. protein_coding NF-X-LIKE 1 (NFXL1) NF-X-LIKE 1 (NFXL1);NF-X-LIKE 1 (ATNFXL1)	1	56.974	1018	388	13	504	3494	200	1188	0	1103			AT1G14830	Encodes a dynamin-like protein that is involved in mitochondrial morphogenesis and pollen development. Protein is localized as speckles in the cytoplasm, partially co-localizes with mitochondrial markers, cell plate of dividing cells, and the tip of root hairs, root cap cells, and expanding part of trichoblasts. protein_coding DYNAMIN-LIKE 1C (DL1C) ARABID
129	TRINITY_DN75501_c0_g3_i3	10.7228	AT2G17930.1	AT2G17930	Component of the SPT module of the SAGA complex. protein_coding (TRA1A) (TRA1A)	1	49.412	170	77	3	5	493	2196	2363	1.15e-34	147			AT1G10290	involved in trafficking from the trans-Golgi Network to the central vacuole. The mRNA is cell-to-cell mobile. protein_coding DYNAMIN-LIKE PROTEIN 6 (ADL6) DYNAMIN-RELATED PROTEIN 2A (DRP2A);DYNAMIN-LIKE PROTEIN 6 (ADL6)
130	TRINITY_DN68195_c0_g1_i4	10.7093	AT5G35570.1	AT5G35570	O-fucosyltransferase family protein;(source:Araport11) protein_coding	1	61.562	653	188	7	129	1925	3	646	0	733			AT1G79730	Encodes a PAF1 homolog that is involved in the control of flowering time by elevating FLC expression to a level that creates the vernalization-responsive, winter-annual habit. Yeast PAF1 is a component of a five-member complex that associates with RNA pol II and is thought to regulate gene expression by recruiting SET1 (a histone 3 Lys 4 [H3-K4] methyl transferas
131	TRINITY_DN54733_c0_g1_i2	10.7093	AT1G02180.1	AT1G02180	ferredoxin-like protein;(source:Araport11) protein_coding	1	46.154	156	80	3	321	779	33	187	1.79e-39	140			AT1G77300	Encodes a protein with histone lysine N-methyltransferase activity required specifically for the trimethylation of H3-K4 in FLC chromatin (and not in H3-K36 dimethylation). Acts as an inhibitor of flowering specifically involved in the autonomous promotion pathway. EFS also regulates the expression of genes involved in carotenoid biosynthesis and nitrogen assimila
132	TRINITY_DN72469_c0_g1_i2	-10.707	AT1G77300.2	AT1G77300	Encodes a protein with histone lysine N-methyltransferase activity required specifically for the trimethylation of H3-K4 in FLC chromatin (and not in H3-K36 dimethylation). Acts as an inhibitor of flowering specifically involved in the autonomous promotion pathway. EFS also regulates the expression of genes involved in carotenoid biosynthesis and nitrogen assimila	1	60.896	335	125	3	1629	2618	858	1191	6.62e-120	418			AT5G15350	early nodulin-like protein 17;(source:Araport11) protein_coding EARLY NODULIN-LIKE PROTEIN 17 (ENODL17) (AtENODL17);EARLY NODULIN-LIKE PROTEIN 17 (ENODL17)
133	TRINITY_DN75434_c0_g4_i1	10.6958	AT5G17910.3	AT5G17910	cardiomyopathy-associated protein;(source:Araport11) protein_coding	1	36.061	330	147	13	995	1834	263	578	3.9e-33	140			AT2G27035	Has been classified as a stellacyanin. Has also been classified as an early nodulin-like protein (ENODL), because it does not have a His residue involved in Cu binding. ENODLs are proteins having one plastocyanin-like (PCNL) domain lacking the amino acid residues necessary for Cu binding. protein_coding EARLY NODULIN-LIKE PROTEIN 20 (ENODL20) EARLY NODULIN-
134	TRINITY_DN72707_c1_g1_i14	-10.6785	AT2G19380.1	AT2G19380	RNA recognition motif (RRM)-containing protein;(source:Araport11) protein_coding	3	28.655	171	90	6	620	1036	87	257	1.14e-06	52.4			AT5G26850	Part of a nanodomain complex that tethers PI4K&#945;1 to the plasma membrane. protein_coding EFR3 OF PLANT 4 (EFOP4) EFR3 OF PLANT 4 (EFOP4)
135	TRINITY_DN71096_c0_g1_i6	10.6544	AT3G22150.2	AT3G22150	Involved in RNA editing of plastid atpF and mitochondrial nad5. protein_coding ATPF EDITING FACTOR 1 (AEF1) ATPF EDITING FACTOR 1 (AEF1)	1	53.766	770	338	9	253	2526	38	801	0	833			AT4G21190	Pentatricopeptide repeat (PPR) superfamily protein;(source:Araport11) protein_coding EMBRYO DEFECTIVE 1417 (emb1417) EMBRYO DEFECTIVE 1417 (emb1417)
136	TRINITY_DN71492_c2_g1_i25	-10.6346	AT2G39970.1	AT2G39970	Encodes peroxisomal membrane protein 38 (PMP38). Mutation in this protein results in enlargement of peroxisomes. Delivers NAD+ for optimal fatty acid degradation during storage oil mobilization. protein_coding PEROXISOMAL NAD CARRIER (PXN) PEROXISOMAL NAD CARRIER (PXN);ABERRANT PEROXISOME MORPHOLOGY 3 (APEM3);PEROXISOMAL MEMBRANE PROTEIN 38 (PMP38)	1	67.197	314	94	3	197	1126	22	330	1.12e-150	432			AT3G05680	Encodes a splicing/methylation factor that is a homologue to the mammalian VIRILIZER, is member of a core set of mRNA m6A writer proteins and is required for N6-adenosine methylation of mRNA. Analysis of transcriptional profiles of the vir-1 mutant suggests that VIR is likely involved in regulation of gene expression, but the function of VIR is rather general than
137	TRINITY_DN73557_c0_g1_i1	-10.6346	AT3G52140.1	AT3G52140	Involved in regulating mitochondrial quality control. Regulates mitochondrial association time and thereby is involved in mitochondrial fusion. Mutants show unregulated autophagy and display transcriptomic markers of mitochondrial stress. Its activity can be modulated by Lys acetylation. protein_coding NON RESPONDING TO OXYLIPINS 38 (NOXY38) NON RESPONDING	1	65.789	1330	395	12	394	4305	100	1395	0	1693			AT3G04400	Involved in non-host resistance. protein_coding EMBRYO DEFECTIVE 2171 (emb2171) (RPL23);EMBRYO DEFECTIVE 2171 (emb2171)
138	TRINITY_DN74851_c0_g1_i8	10.6333	AT5G50000.1	AT5G50000	Belongs to the Raf-like kinase subfamily of the mitogen-activated protein kinase kinase kinase (MAPKKK) family. Negatively regulates stomatal opening by negatively regulating plasma membrane H+-ATPase phosphorylation. protein_coding CONVERGENCE OF BLUE LIGHT AND CO2 2 (CBC2) CONVERGENCE OF BLUE LIGHT AND CO2 2 (CBC2)	2	30.612	49	34	0	1536	1390	304	352	6.1	30.4			AT1G48175	Cytidine/deoxycytidylate deaminase family protein;(source:Araport11) protein_coding EMBRYO DEFECTIVE 2191 (emb2191) EMBRYO DEFECTIVE 2191 (emb2191);TRNA ADENOSINE DEAMINASE 2 (TAD2); (ATTAD2)
139	TRINITY_DN73008_c0_g1_i3	10.6333	AT1G01040.1	AT1G01040	Encodes a Dicer homolog. Dicer is a RNA helicase involved in microRNA processing. Mutations in this locus can result in embryo lethality. Embryo shape at seed maturity is globular-elongate. Other mutants convert the floral meristems to an indeterminate state, others yet show defects in ovule development. mRNA is expressed in all shoot tissues. DCL1 is able to prod	1	75.345	1740	394	11	837	5993	183	1908	0	2636			AT3G48470	embryo defective 2423;(source:Araport11) protein_coding EMBRYO DEFECTIVE 2423 (EMB2423) EMBRYO DEFECTIVE 2423 (EMB2423)
140	TRINITY_DN26848_c0_g1_i1	10.6261	AT3G13760.1	AT3G13760	Cysteine/Histidine-rich C1 domain family protein;(source:Araport11) protein_coding	1	46.429	28	15	0	14	97	61	88	4.6	29.6			AT1G10910	Member of the P subfamily of PRR proteins. Loss of function results in defects in abnormal plastid RNA edit and chloroplast biogenesis protein_coding EMBRYO DEFECTIVE 3103 (EMB3103) PENTRATRICOPEPTIDE REPEAT PROTEIN PIGMENT-DEFECTIVE MUTANT2 (PDM2);EMBRYO DEFECTIVE 3103 (EMB3103)
141	TRINITY_DN69586_c0_g1_i3	10.6261	AT1G33410.1	AT1G33410	Encodes a nucleoporin that regulates CONSTANS (CO) protein stability through affecting nuclear pore complex localization of an E3-ubiquitin ligase, HIGH EXPRESSION OF OSMOTICALLY RESPONSIVE GENES1 (HOS1), which destabilizes CO protein in the morning period. protein_coding SUPPRESSOR OF AUXIN RESISTANCE1 (SAR1) SUPPRESSOR OF AUXIN RESISTANCE1 (SAR1);ARABIDO	1	43.837	1517	772	23	159	4553	8	1496	0	1165			AT5G23150	Putative transcription factor. Member of the floral homeotic AGAMOUS pathway.Mutations in HUA enhance the phenotype of mild ag-4 allele. Single hua mutants are early flowering and have reduced levels of FLC mRNA. Other MADS box flowering time genes such as FLM and MAF2 also appear to be regulated by HUA2. HUA2 normally activates FLC expression and enhances AG fu
142	TRINITY_DN70526_c0_g1_i2	-10.6196	AT1G48175.4	AT1G48175	Cytidine/deoxycytidylate deaminase family protein;(source:Araport11) protein_coding EMBRYO DEFECTIVE 2191 (emb2191) EMBRYO DEFECTIVE 2191 (emb2191);TRNA ADENOSINE DEAMINASE 2 (TAD2); (ATTAD2)	1	69.231	169	48	1	281	787	12	176	2.73e-81	244			AT4G22060	F-box protein (DUF295);(source:Araport11) protein_coding F-BOX/DUF295 BRASSICEAE-SPECIFIC 29 (ATFDB29) F-BOX/DUF295 BRASSICEAE-SPECIFIC 29 (ATFDB29)
143	TRINITY_DN74480_c1_g3_i2	-10.6196	AT3G20720.2	AT3G20720	amino-terminal region of chorein;(source:Araport11) protein_coding	1	53.173	914	396	15	77	2785	307	1199	0	915			AT4G38180	FAR1-related sequence 5;(source:Araport11) protein_coding FAR1-RELATED SEQUENCE 5 (FRS5) FAR1-RELATED SEQUENCE 5 (FRS5)
144	TRINITY_DN70307_c0_g1_i2	10.619	AT3G49650.1	AT3G49650	P-loop containing nucleoside triphosphate hydrolases superfamily protein;(source:Araport11) protein_coding	1	73.186	634	148	7	291	2159	1	623	0	927			AT5G18580	fass mutants have aberrant cell shapes due to defects in arrangement of cortical microtubules. Encodes a protein highly conserved in higher plants and similar in its C-terminal part to B' regulatory subunits of type 2A protein phosphatases. Interacts with an Arabidopsis type A subunit of PP2A in the yeast two-hybrid system. protein_coding FASS 1 (FASS)
145	TRINITY_DN73806_c1_g1_i10	-10.5969	AT3G19210.1	AT3G19210	Encodes RAD54, a member of the SWI2/SNF2 family of DNA-stimulated ATPases. Functions in DNA repair via homologous recombination. protein_coding HOMOLOG OF RAD54 (RAD54) HOMOLOG OF RAD54 (ATRAD54); (CHR25);HOMOLOG OF RAD54 (RAD54)	1	70.251	837	201	7	383	2884	51	842	0	1149			AT5G63960	Encodes the catalytic subunits of DNA polymerase &#948;, which is involved in the deposition of epigenetic marks. protein_coding GIGANTEA SUPPRESSOR5 (GIS5) EMBRYO DEFECTIVE 2780 (EMB2780);GIGANTEA SUPPRESSOR5 (GIS5)
146	TRINITY_DN71355_c0_g1_i7	-10.5816	AT3G48190.2	AT3G48190	Encodes a homolog of the human ATM gene, which is mutated in ataxia telangiectasia, a chromosome instability disorder. Suppresses leaf senescence triggered by DNA double-strand break through epigenetic control of senescence-associated genes. Characterization of mutants suggest a role homologous recombination for DNA damage repair in response to ionizing radiation	1	61.734	1811	676	9	3854	9250	1208	3013	0	2206			AT1G65440	Related to yeast Spt6 protein, which functions as part of a protein complex in transcription initiation and also plays a role in chromatin structure / assembly. It encodes a putative WG/GW-repeat protein involved in the regulation of apical-basal polarity of embryo protein_coding GLOBAL TRANSCRIPTION FACTOR GROUP B1 (GTB1) ARABIDOPSIS SUPPRESSOR OF TY I
147	TRINITY_DN73886_c2_g3_i8	-10.5816	AT2G18960.3	AT2G18960	Encodes a plasma membrane proton ATPase. Mutants have a reduced ability to close their stomata in response to drought and are affected in stomatal but not seed responsiveness to ABA. The mRNA is cell-to-cell mobile. protein_coding H(+)-ATPASE 1 (HA1) H(+)-ATPASE 1 (AHA1);H(+)-ATPASE 1 (HA1);OPEN STOMATA 2 (OST2);PLASMA MEMBRANE PROTON ATPASE (PMA)	1	88.095	378	45	0	2	1135	124	501	0	701			AT2G48150	Encodes glutathione peroxidase. protein_coding GLUTATHIONE PEROXIDASE 4 (GPX4) GLUTATHIONE PEROXIDASE 4 (ATGPX4); (GPXL4);GLUTATHIONE PEROXIDASE 4 (GPX4)
148	TRINITY_DN73827_c1_g1_i11	10.5679	AT2G28390.1	AT2G28390	SAND family protein;(source:Araport11) protein_coding MONENSIN SENSITIVITY1 (MON1) MONENSIN SENSITIVITY1 (MON1)	1	72.727	396	106	1	646	1833	160	553	0	597			AT2G18960	Encodes a plasma membrane proton ATPase. Mutants have a reduced ability to close their stomata in response to drought and are affected in stomatal but not seed responsiveness to ABA. The mRNA is cell-to-cell mobile. protein_coding H(+)-ATPASE 1 (HA1) H(+)-ATPASE 1 (AHA1);H(+)-ATPASE 1 (HA1);OPEN STOMATA 2 (OST2);PLASMA MEMBRANE PROTON ATPASE (PMA)
149	TRINITY_DN72804_c0_g1_i3	-10.5583	AT5G15270.3	AT5G15270	RNA-binding KH domain-containing protein;(source:Araport11) protein_coding (ATKH25) (ATKH25)	1	53.753	493	209	8	172	1617	11	495	3.91e-145	464			AT5G62670	H[+]-ATPase 11;(source:Araport11) protein_coding H(+)-ATPASE 11 (HA11) H(+)-ATPASE 11 (AHA11);H(+)-ATPASE 11 (HA11)
150	TRINITY_DN75614_c0_g1_i2	10.5529	AT1G55690.3	AT1G55690	Sec14p-like phosphatidylinositol transfer family protein;(source:Araport11) protein_coding	1	48.88	491	228	8	13	1446	114	594	8.31e-126	382			AT3G23990	mitochondrial chaperonin HSP. assist in rapid assembly of the oligomeric protein structures in the mitochondria. protein_coding HEAT SHOCK PROTEIN 60 (HSP60) HEAT SHOCK PROTEIN 60-3B (HSP60-3B);HEAT SHOCK PROTEIN 60 (HSP60)
151	TRINITY_DN75312_c0_g3_i17	-10.5425	AT3G03130.1	AT3G03130	lisH domain-like protein;(source:Araport11) protein_coding	1	70.37	54	13	1	112	264	1	54	1.43e-15	82			AT2G30620	winged-helix DNA-binding transcription factor family protein;(source:Araport11) protein_coding HISTONE 1.2 (H1.2) (HON2);HISTONE 1.2 (H1.2)
152	TRINITY_DN67047_c0_g1_i1	10.5226	AT4G03180.1	AT4G03180	rRNA-processing protein;(source:Araport11) protein_coding	1	41.176	153	83	1	332	790	35	180	2.19e-20	88.2			AT5G65360	Histone superfamily protein;(source:Araport11) protein_coding HISTONE 3.1 (H3.1) HISTONE 3.1 (H3.1); (HTR1)
153	TRINITY_DN73728_c4_g4_i4	10.5149	AT5G55720.1	AT5G55720	Pectin lyase-like superfamily protein;(source:Araport11) protein_coding	2	24.242	66	49	1	635	438	134	198	7.9	29.3			AT5G10980	Histone superfamily protein;(source:Araport11) protein_coding HISTONE 3.3 (H3.3) (HTR8);HISTONE 3.3 (H3.3)
154	TRINITY_DN74031_c1_g5_i2	-10.5105	AT3G63530.2	AT3G63530	Encodes a novel E3 ubiquitin ligase that acts as a central negative regulator of Arabidopsis floral organ size. Organ size is limited by restricting the period of proliferative growth, rather than the rate of growth and appears to act in a novel pathway, independent of ANT and JAG. Both mRNA and protein are expressed in all actively growing regions of the plant a	1	46.964	247	122	6	355	1086	4	244	1.3e-62	206			AT1G16710	Encodes an enzyme with histone acetyltransferase activity that can use both H3 and H4 histones as substrates. No single prior lysine acetylation is sufficient to block HAC12 acetylation of the H3 or H4 peptides, suggesting that HAC12 can acetylate any of several lysines present in the peptides. protein_coding HISTONE ACETYLTRANSFERASE OF THE CBP FAMILY 12
155	TRINITY_DN75371_c2_g1_i13	10.5072	AT2G33490.3	AT2G33490	hydroxyproline-rich glycoprotein family protein;(source:Araport11) protein_coding	1	51.735	634	263	19	351	2228	1	599	8.24e-151	467			AT5G02560	Encodes HTA12, a histone H2A protein. protein_coding HISTONE H2A 12 (HTA12) HISTONE H2A 12 (HTA12); (H2A.W.12)
156	TRINITY_DN72707_c1_g1_i1	-10.5024	AT5G61190.1	AT5G61190	putative endonuclease or glycosyl hydrolase with C2H2-type zinc finger domain-containing protein;(source:Araport11) protein_coding	2	21.168	274	180	8	417	1157	241	505	7.6e-07	53.1			AT5G59870	Encodes HTA6, a histone H2A protein. protein_coding HISTONE H2A 6 (HTA6) (H2A.W.6);HISTONE H2A 6 (HTA6)
157	TRINITY_DN72475_c0_g2_i1	10.4994	AT3G15350.2	AT3G15350	G14 enzyme protein_coding	1	25.424	59	40	1	228	392	213	271	7.4	27.7			AT5G03160	J domain protein localized in ER lumen. Can partially compensate for the growth defect in jem1 scj1 mutant yeast. protein_coding HOMOLOG OF MAMALLIAN P58IPK (P58IPK) HOMOLOG OF MAMALLIAN P58IPK (ATP58IPK);HOMOLOG OF MAMALLIAN P58IPK (P58IPK)
158	TRINITY_DN68690_c0_g1_i1	10.4916	AT1G55910.1	AT1G55910	member of Putative zinc transporter ZIP2 - like family protein_coding ZINC TRANSPORTER 11 PRECURSOR (ZIP11) ZINC TRANSPORTER 11 PRECURSOR (ZIP11)	1	59.76	333	96	6	49	1011	20	326	7.02e-120	352			AT3G19210	Encodes RAD54, a member of the SWI2/SNF2 family of DNA-stimulated ATPases. Functions in DNA repair via homologous recombination. protein_coding HOMOLOG OF RAD54 (RAD54) HOMOLOG OF RAD54 (ATRAD54); (CHR25);HOMOLOG OF RAD54 (RAD54)
159	TRINITY_DN75422_c0_g1_i4	10.4758	AT1G79740.4	AT1G79740	hAT transposon superfamily;(source:Araport11) protein_coding	1	58.555	678	250	9	187	2208	1	651	0	818			AT3G56440	yeast autophagy 18 D-like protein;(source:Araport11) protein_coding HOMOLOG OF YEAST AUTOPHAGY 18 (ATG18) D (ATG18D) HOMOLOG OF YEAST AUTOPHAGY 18 (ATG18) D (ATATG18D);HOMOLOG OF YEAST AUTOPHAGY 18 (ATG18) D (ATG18D)
160	TRINITY_DN73887_c2_g2_i7	-10.461	AT3G23430.1	AT3G23430	Encodes a protein with the mainly hydrophilic N-terminal and the C-terminal containing 6 potential membrane-spanning domains. The mutant is deficient in the transfer of phosphate from root epidermal and cortical cells to the xylem. Its expression is repressed by phosphate (Pi) in shoots, and transiently induced by phosphite (Phi) in roots and shoots. PHO is expre	1	42.553	47	27	0	854	994	716	762	4.29e-05	47			AT5G58040	Encodes a subunit of the polyadenylation apparatus that interacts with and stimulates the activity of poly(A) polymerase. Additionally , it interacts with several polyadenylation factor subunits and is an RNA-binding protein. It is suggested that this protein coordinates a number of polyadenylation factor subunits with PAP and with RNA. The mRNA is cell-to-cell
161	TRINITY_DN72610_c0_g1_i6	10.4519	AT2G32900.1	AT2G32900	Homologous to Drosophila ZW10, a centromere/kinetochore protein involved in chromosome segregation. Member of MAG2 complex on the ER that is responsible for efficient transport of seed storage proteins, functions in protein transport between the ER and Golgi apparatus, contain a Zeste?White 10 (ZW10) domain and a Sec39 domain. Required for proper maturation of see	1	43.506	154	86	1	206	664	4	157	4.01e-35	122			AT1G60160	Member of the KT/KUP/HAK family of proton-coupled potassium transporters which have potential effect on cellular expansion. protein_coding K TRANSPORTER12 (KT12) K TRANSPORTER12 (KT12)
162	TRINITY_DN68500_c0_g1_i1	10.4438	AT5G59180.1	AT5G59180	Non-catalytic subunit specific to DNA-directed RNA polymerase II; the ortholog of budding yeast RPB7 protein_coding (NRPB7) (NRPB7)	1	89.205	176	19	0	211	738	1	176	1.19e-113	327			AT1G21730	P-loop containing nucleoside triphosphate hydrolases superfamily protein;(source:Araport11) protein_coding KINESIN 7.1 (KIN7.1) KINESIN 7.1 (KIN7.1)
163	TRINITY_DN68191_c0_g1_i3	-10.4357	AT3G56440.1	AT3G56440	yeast autophagy 18 D-like protein;(source:Araport11) protein_coding HOMOLOG OF YEAST AUTOPHAGY 18 (ATG18) D (ATG18D) HOMOLOG OF YEAST AUTOPHAGY 18 (ATG18) D (ATATG18D);HOMOLOG OF YEAST AUTOPHAGY 18 (ATG18) D (ATG18D)	1	63.934	366	122	2	418	1512	30	386	2.76e-172	495			AT1G03070	Bax inhibitor-1 family protein;(source:Araport11) protein_coding LIFEGUARD 4 (LFG4) (ATLFG4);LIFEGUARD 4 (LFG4)
164	TRINITY_DN72262_c3_g1_i4	10.4357	AT1G22930.1	AT1G22930	T-complex protein 11;(source:Araport11) protein_coding	1	45.28	1091	490	23	1056	4148	85	1128	0	766			AT2G15230	Lipase active on medium and short chain triacylglycerols, but not on phospho- or galactolipids. Active between pH4 and 7 with an optimum at pH6. Knock-out mutant has not obvious phenotype. Predicted to be extracellular. protein_coding LIPASE 1 (LIP1) LIPASE 1 (ATLIP1);LIPASE 1 (LIP1)
165	TRINITY_DN34743_c0_g1_i1	10.4357	AT3G21060.1	AT3G21060	Encodes a structural core component of a COMPASS-like H3K4 histone methylation complex that is also involved in the timing of the floral transition. protein_coding RBBP5 LIKE (RBL) RBBP5 LIKE (RBL)	1	45.455	22	12	0	314	249	37	58	4.2	30			AT3G57650	Encodes an endoplasmic reticulum localized protein with lysophosphatidyl acyltransferase activity. protein_coding LYSOPHOSPHATIDYL ACYLTRANSFERASE 2 (LPAT2) LYSOPHOSPHATIDYL ACYLTRANSFERASE 2 (LPAT2)
166	TRINITY_DN62531_c0_g1_i7	10.4275	AT5G17900.1	AT5G17900	microfibrillar-associated protein-like protein;(source:Araport11) protein_coding	1	68.98	245	75	1	750	1481	177	421	9.92e-79	253			AT1G02170	Encodes a type I metacaspase. Two Arabidopsis metacaspases, AT1G02170 (MC1) and AT4G25110 (MC2) antagonistically control programmed cell death in Arabidopsis. MC1 is a positive regulator of cell death and requires conserved caspase-like putative catalytic residues for its function. MC2 negatively regulates cell death. This function is independent of the putative
167	TRINITY_DN68147_c0_g1_i4	10.411	AT3G19770.1	AT3G19770	Guanine nucleotide exchange factor VPS9a. Can activate all Rab5 members to GTP-bound forms in vitro. Required for embryogenesis. Regulates the localization of ARA7 and ARA6. Involved in postembryonic root development. protein_coding (VPS9A) ARABIDOPSIS THALIANA VACUOLAR PROTEIN SORTING 9A (AtVPS9A); (VPS9); (VPS9A)	1	61.928	415	140	5	342	1547	8	417	1.66e-169	498			AT1G67120	Represents a homolog of the yeast MDN gene, which encodes a non-ribosomal protein involved in the maturation and assembly of the 60S ribosomal subunit. In Arabidopsis, it is essential for female gametogenesis progression. protein_coding MIDASIN 1 (MDN1) (ATMDN1);MIDASIN 1 (MDN1)
168	TRINITY_DN74303_c1_g1_i13	-10.4099	AT2G29210.1	AT2G29210	splicing factor PWI domain-containing protein;(source:Araport11) protein_coding	2	55.319	47	18	1	1597	1737	834	877	0.001	43.1			AT2G28390	SAND family protein;(source:Araport11) protein_coding MONENSIN SENSITIVITY1 (MON1) MONENSIN SENSITIVITY1 (MON1)
169	TRINITY_DN59396_c0_g1_i2	-10.4099	no hit																AT4G37280	MRG1 and MRG2 proteins act as readers of H3K4me3/H3K36me3 marked chromatin. They interact with each other and CO to regulate the expression of FT. protein_coding MORF RELATED GENE 1 (MRG1) MORF RELATED GENE 1 (MRG1)
170	TRINITY_DN71882_c0_g2_i9	10.3775	AT2G34190.1	AT2G34190	Xanthine/uracil permease family protein;(source:Araport11) protein_coding	1	77.015	335	77	0	236	1240	11	345	0	520			AT2G05990	Encodes enoyl-ACP reductase a component of the fatty acid synthase complex. A reduced function mutation in this gene, mod1, was found in a screen for premature cell death mutants. Mutant plants have reduced lipid level and pleiotropic morphological defects, including chlorotic and abnormally shaped leaves. The mRNA is cell-to-cell mobile. protein_coding MOSAIC
171	TRINITY_DN75131_c2_g1_i2	10.369	AT4G01850.2	AT4G01850	S-adenosylmethionine synthetase 2;(source:Araport11) protein_coding S-ADENOSYLMETHIONINE SYNTHETASE 2 (SAM-2) (AtSAM2);S-ADENOSYLMETHIONINE SYNTHETASE 2 (SAM2); (MAT2);S-ADENOSYLMETHIONINE SYNTHETASE 2 (SAM-2)	1	92.092	392	31	0	229	1404	2	393	0	731			AT2G20370	Encodes a xyloglucan galactosyltransferase located in the membrane of Golgi stacks that is involved in the biosynthesis of fucose. It is also involved in endomembrane organization. It is suggested that it is a dual-function protein that is responsible for actin organization and the synthesis of cell wall materials. The mRNA is cell-to-cell mobile. protein_coding
172	TRINITY_DN74618_c0_g1_i3	10.369	AT5G14050.1	AT5G14050	Transducin/WD40 repeat-like superfamily protein;(source:Araport11) protein_coding	1	63.147	502	161	7	247	1722	59	546	0	582			AT1G10170	Encodes AtNFXL1, a homologue of the putative human transcription repressor NF-X1. Functions as a negative regulator of the trichothecene phytotoxin-induced defense response. protein_coding NF-X-LIKE 1 (NFXL1) NF-X-LIKE 1 (NFXL1);NF-X-LIKE 1 (ATNFXL1)
173	TRINITY_DN74876_c1_g2_i1	-10.3658	AT3G12810.1	AT3G12810	Encodes a protein similar to ATP-dependent, chromatin-remodeling proteins of the ISWI and SWI2/SNF2 family. Genetic analyses suggest that this gene is involved in multiple flowering pathways. Mutations in PIE1 results in suppression of FLC-mediated delay of flowering and causes early flowering in noninductive photoperiods independently of FLC. PIE1 is required for	1	65.16	1504	445	19	175	4602	13	1465	0	1749			AT5G55810	encodes a bi-functional enzyme that expresses both nicotinamide-nucleotide adenylyltransferase (2.7.7.1) and nicotinate-nucleotide adenylyltransferase (2.7.7.18)activity. protein_coding NICOTINATE/NICOTINAMIDE MONONUCLEOTIDE ADENYLTRANSFERASE (NMNAT) NICOTINATE/NICOTINAMIDE MONONUCLEOTIDE ADENYLTRANSFERASE (NMNAT)
174	TRINITY_DN65690_c0_g1_i2	-10.3658	AT1G68540.1	AT1G68540	NAD(P)-binding Rossmann-fold superfamily protein;(source:Araport11) protein_coding TETRAKETIDE ALPHA-PYRONE REDUCTASE 2 (TKPR2) CINNAMOYL COA REDUCTASE-LIKE 6 (CCRL6);TETRAKETIDE ALPHA-PYRONE REDUCTASE 2 (TKPR2)	1	66.355	321	107	1	81	1040	1	321	6.73e-149	426			AT1G02860	Encodes a ubiquitin E3 ligase with RING and SPX domains that is involved in mediating immune responses and mediates degradation of PHT1s at plasma membranes. Targeted by MIR827. Ubiquitinates PHT1;3, PHT1;2, PHT1;1/AtPT1 and PHT1;4/AtPT2. protein_coding NITROGEN LIMITATION ADAPTATION (NLA) NITROGEN LIMITATION ADAPTATION (NLA); (SYG1);BENZOIC ACID HYPERSENSITI
175	TRINITY_DN74851_c0_g1_i15	10.3604	AT5G50000.1	AT5G50000	Belongs to the Raf-like kinase subfamily of the mitogen-activated protein kinase kinase kinase (MAPKKK) family. Negatively regulates stomatal opening by negatively regulating plasma membrane H+-ATPase phosphorylation. protein_coding CONVERGENCE OF BLUE LIGHT AND CO2 2 (CBC2) CONVERGENCE OF BLUE LIGHT AND CO2 2 (CBC2)	2	30.612	49	34	0	1758	1612	304	352	8.8	30.4			AT3G52140	Involved in regulating mitochondrial quality control. Regulates mitochondrial association time and thereby is involved in mitochondrial fusion. Mutants show unregulated autophagy and display transcriptomic markers of mitochondrial stress. Its activity can be modulated by Lys acetylation. protein_coding NON RESPONDING TO OXYLIPINS 38 (NOXY38) NON RESPONDING
176	TRINITY_DN73097_c1_g5_i2	-10.3478	AT3G28470.1	AT3G28470	Member of the R2R3 factor gene family. Its E-box is critical for the DYT1- bHLH089 heterocomplex to bind to and activate its transcription. protein_coding DEFECTIVE IN MERISTEM DEVELOPMENT AND FUNCTION 1 (TDF1) MYB DOMAIN PROTEIN 35 (AtMYB35); (MYB35);DEFECTIVE IN MERISTEM DEVELOPMENT AND FUNCTION 1 (TDF1)	1	44.937	316	162	6	103	1020	1	314	2.72e-72	231			AT2G34160	Alba DNA/RNA-binding protein;(source:Araport11) protein_coding NVOLVED IN RRNA PROCESSING 7 (IRP7) (ALBA2);NVOLVED IN RRNA PROCESSING 7 (IRP7)
177	TRINITY_DN75179_c0_g1_i3	10.3345	AT1G56690.1	AT1G56690	Pentatricopeptide repeat (PPR) superfamily protein;(source:Araport11) protein_coding	1	58.832	702	288	1	136	2238	3	704	0	885			AT3G22270	Topoisomerase II-associated protein PAT1;(source:Araport11) protein_coding PAT1 HOMOLOG 1 (PAT1H1) PAT1 HOMOLOG 1 (PAT1H1); (PATH1); (ATPAT1H1)
178	TRINITY_DN74161_c2_g2_i9	10.3345	AT1G16710.9	AT1G16710	Encodes an enzyme with histone acetyltransferase activity that can use both H3 and H4 histones as substrates. No single prior lysine acetylation is sufficient to block HAC12 acetylation of the H3 or H4 peptides, suggesting that HAC12 can acetylate any of several lysines present in the peptides. protein_coding HISTONE ACETYLTRANSFERASE OF THE CBP FAMILY 12	1	46.932	1581	618	44	350	4894	1	1426	0	1139			AT5G05340	Encodes a protein with sequence similarity to peroxidases that is involved in lignin biosynthesis. Loss of function mutations show abnormal development of xylem fibers and reduced levels of lignin biosynthetic enxymes. protein_coding PEROXIDASE 52 (PRX52) PEROXIDASE 52 (PRX52)
179	TRINITY_DN73088_c0_g2_i6	10.3257	AT1G24090.1	AT1G24090	RNase H family protein;(source:Araport11) protein_coding (RNH1C) (RNH1C)	1	54.152	277	100	3	437	1192	76	350	1.89e-89	278			AT3G07560	Encodes peroxin 13 (PEX13) involved in protein transport into peroxisomes, for example, peroxisomal import of nitric oxide synthase. protein_coding PEROXIN 13 (PEX13) PEROXIN 13 (PEX13);ABERRANT PEROXISOME MORPHOLOGY 2 (APM2)
180	TRINITY_DN75128_c0_g1_i1	10.3257	AT1G10910.1	AT1G10910	Member of the P subfamily of PRR proteins. Loss of function results in defects in abnormal plastid RNA edit and chloroplast biogenesis protein_coding EMBRYO DEFECTIVE 3103 (EMB3103) PENTRATRICOPEPTIDE REPEAT PROTEIN PIGMENT-DEFECTIVE MUTANT2 (PDM2);EMBRYO DEFECTIVE 3103 (EMB3103)	1	61.76	591	222	3	266	2032	72	660	0	732			AT2G39970	Encodes peroxisomal membrane protein 38 (PMP38). Mutation in this protein results in enlargement of peroxisomes. Delivers NAD+ for optimal fatty acid degradation during storage oil mobilization. protein_coding PEROXISOMAL NAD CARRIER (PXN) PEROXISOMAL NAD CARRIER (PXN);ABERRANT PEROXISOME MORPHOLOGY 3 (APEM3);PEROXISOMAL MEMBRANE PROTEIN 38 (PMP38)
181	TRINITY_DN75290_c0_g3_i4	10.3257	AT4G01860.2	AT4G01860	Transducin family protein / WD-40 repeat family protein;(source:Araport11) protein_coding	1	44.665	1359	617	27	139	4065	14	1287	0	1051			AT3G23430	Encodes a protein with the mainly hydrophilic N-terminal and the C-terminal containing 6 potential membrane-spanning domains. The mutant is deficient in the transfer of phosphate from root epidermal and cortical cells to the xylem. Its expression is repressed by phosphate (Pi) in shoots, and transiently induced by phosphite (Phi) in roots and shoots. PHO is expre
182	TRINITY_DN69301_c0_g1_i2	-10.3203	AT5G04990.1	AT5G04990	Encodes a member of the Sad1/UNC-84 (SUN)-domain proteins: AtSUN1(At5g04990), AtSUN2(AT3G10730). SUN domain proteins are part of the cytoskeletal-nucleoskeletal bridging complexes. AtSUN1 and AtSUN2 are localized to the nuclear envelope and are present as homomers and heteromers in vivo.Encodes an outer nuclear membrane protein that anchors RanGAP1 to the nuclea	1	52.787	305	136	4	654	1565	155	452	3.06e-105	326			AT3G12810	Encodes a protein similar to ATP-dependent, chromatin-remodeling proteins of the ISWI and SWI2/SNF2 family. Genetic analyses suggest that this gene is involved in multiple flowering pathways. Mutations in PIE1 results in suppression of FLC-mediated delay of flowering and causes early flowering in noninductive photoperiods independently of FLC. PIE1 is required for
183	TRINITY_DN73142_c0_g1_i3	10.3169	AT4G28020.1	AT4G28020	tRNA-thr(GGU) m(6)t(6)A37 methyltransferase;(source:Araport11) protein_coding	1	57.516	306	101	3	334	1251	72	348	4.73e-122	362			AT1G72390	nuclear receptor coactivator;(source:Araport11) protein_coding PHYTOCHROME-DEPENDENT LATE-FLOWERING (PHL) PHYTOCHROME-DEPENDENT LATE-FLOWERING (PHL)
184	TRINITY_DN71572_c2_g1_i7	-10.311	AT3G30390.3	AT3G30390	Encodes a putative amino acid transporter. protein_coding	1	62.458	301	103	3	218	1093	9	308	4.28e-103	311			AT2G23140	PUB4 encodes a functional ubiquitin-protein ligase. The gene is expressed in most plant tissues and the protein localizes to the nucleus. PUB4 has been recovered as a second site suppressor from several different genetic screens and from these, it has been inferred to have roles in regulating root development, pollen tapetum development and ROS induced chloroplast
185	TRINITY_DN67194_c0_g1_i2	-10.311	AT5G59740.1	AT5G59740	UDP-N-acetylglucosamine (UAA) transporter family;(source:Araport11) protein_coding	1	41.477	176	102	1	134	661	15	189	3.52e-26	109			AT3G22200	Genetically redundant with POP3;mediates pollen tube guidance. Double mutants are self sterile; gamma-aminobutyrate transaminase subunit precursor; nuclear gene for mitochondrial product. Encodes gamma-aminobutyrate transaminase that uses pyruvate instead of alpha-ketoglutarate as cosubstrate. Mutations in POP2/HER1 render roots resistant to the inhibitory growth
186	TRINITY_DN67369_c0_g1_i1	10.308	AT4G21190.1	AT4G21190	Pentatricopeptide repeat (PPR) superfamily protein;(source:Araport11) protein_coding EMBRYO DEFECTIVE 1417 (emb1417) EMBRYO DEFECTIVE 1417 (emb1417)	1	65.854	246	81	2	247	975	1	246	8.02e-106	318			AT4G02060	Member of the minichromosome maintenance complex, involved in DNA replication initiation. Abundant in proliferating and endocycling tissues. Localized in the nucleus during G1, S and G2 phases of the cell cycle, and are released into the cytoplasmic compartment during mitosis. Binds chromatin. protein_coding PROLIFERA (PRL) (MCM7);PROLIFERA (PRL)
187	TRINITY_DN73019_c0_g1_i6	10.2991	AT4G28130.1	AT4G28130	diacylglycerol kinase 6;(source:Araport11) protein_coding DIACYLGLYCEROL KINASE 6 (DGK6) (ATDGK6);DIACYLGLYCEROL KINASE 6 (DGK6)	1	30.435	92	59	3	87	350	16	106	0.31	34.3			AT5G11450	PsbP domain protein (Mog1/PsbP/DUF1795-like photosystem II reaction center PsbP family protein);(source:Araport11) protein_coding PSBP DOMAIN PROTEIN 5 (PPD5) PSBP DOMAIN PROTEIN 5 (PPD5)
188	TRINITY_DN73530_c0_g2_i5	-10.2923	AT2G22490.1	AT2G22490	encodes a D-type cyclin whose transcription level is regulated by sucrose but not phytohormones or nitrate. Protein physically interacts with CDC2A. CycD2 kinase activity is regulated by sequestration of CycD2 protein in a form inaccessible to immunoprecipitation and probably not complexed to CDC2A. protein_coding CYCLIN D2;1 (CYCD2;1) CYCLIN D2;1 (CYCD2;1)	1	50.699	286	127	4	1497	2318	53	336	2.61e-73	246			AT3G20500	purple acid phosphatase 18;(source:Araport11) protein_coding PURPLE ACID PHOSPHATASE 18 (PAP18) PURPLE ACID PHOSPHATASE 18 (PAP18);PURPLE ACID PHOSPHATASE 18 (ATPAP18)
189	TRINITY_DN70288_c0_g1_i1	10.2811	AT3G22270.1	AT3G22270	Topoisomerase II-associated protein PAT1;(source:Araport11) protein_coding PAT1 HOMOLOG 1 (PAT1H1) PAT1 HOMOLOG 1 (PAT1H1); (PATH1); (ATPAT1H1)	1	42.659	865	347	24	293	2821	19	756	2.19e-163	505			AT3G21060	Encodes a structural core component of a COMPASS-like H3K4 histone methylation complex that is also involved in the timing of the floral transition. protein_coding RBBP5 LIKE (RBL) RBBP5 LIKE (RBL)
190	TRINITY_DN144989_c0_g1_i1	10.2811	AT1G30970.3	AT1G30970	Encodes SUF4 (SUPPRESSOR of FRI 4), a putative zinc-finger-containing transcription factor that is required for delayed flowering in winter-annual Arabidopsis. suf4 mutations strongly suppress the late-flowering phenotype of FRI (FRIGIDA) mutants. suf4 mutants also show reduced H3K4 trimethylation at FLC (FLOWERING LOCUS C), a floral inhibitor. SUF4 may act to	1	26.415	53	35	1	41	199	14	62	0.004	36.2			AT4G18590	Nucleic acid-binding, OB-fold-like protein;(source:Araport11) protein_coding REPLICATION PROTEIN A 3B (RPA3B) REPLICATION PROTEIN A 3B (RPA3B)
191	TRINITY_DN71734_c3_g4_i8	10.272	no hit																AT3G56340	Small ribosomal subunit protein. protein_coding RIBOSOMAL PROTEIN S26E (RPS26E) RIBOSOMAL PROTEIN S26E (RPS26E)
192	TRINITY_DN67430_c0_g2_i1	10.272	AT3G27550.2	AT3G27550	Mitochondrial protein involved in RNA splicing. Required for normal mitochondrion biogenesis. protein_coding (CFM9) (CFM9)	1	71.244	386	96	6	289	1413	1	382	5.28e-143	432			ATCG00190	Chloroplast DNA-dependent RNA polymerase B subunit. The transcription of this gene is regulated by a nuclear encoded RNA polymerase. This gene has been transferred to mitochondrial genome during crucifer evolution. protein_coding RNA POLYMERASE SUBUNIT BETA (RPOB) RNA POLYMERASE SUBUNIT BETA (RPOB)
193	TRINITY_DN74327_c1_g4_i4	10.272	AT1G48410.3	AT1G48410	Encodes an RNA Slicer that selectively recruits microRNAs and siRNAs. There is currently no evidence that AGO1 Slicer is in a high molecular weight RNA-induced silencing complex (RISC). Mutants are defective in post-transcriptional gene silencing and have pleiotropic developmental and morphological defects. Through its action on the regulation of ARF17 expressi	1	81.604	636	113	2	2652	4550	416	1050	0	1086			AT1G02500	encodes a S-adenosylmethionine synthetase. SAM1 is regulated by protein S-nitrosylation. The covalent binding of nitric oxide (NO) to the Cys114 residue inhibits the enzyme activity. protein_coding S-ADENOSYLMETHIONINE SYNTHETASE 1 (SAM1) S-ADENOSYLMETHIONINE SYNTHETASE 1 (SAM1);S-ADENOSYLMETHIONINE SYNTHETASE-1 (SAM-1); (METK1); (AtSAM1); (MAT1)
194	TRINITY_DN71089_c0_g1_i2	10.272	AT3G11620.8	AT3G11620	alpha/beta-Hydrolases superfamily protein;(source:Araport11) protein_coding	1	56.731	312	129	1	235	1170	5	310	7.04e-124	365			AT4G01850	S-adenosylmethionine synthetase 2;(source:Araport11) protein_coding S-ADENOSYLMETHIONINE SYNTHETASE 2 (SAM-2) (AtSAM2);S-ADENOSYLMETHIONINE SYNTHETASE 2 (SAM2); (MAT2);S-ADENOSYLMETHIONINE SYNTHETASE 2 (SAM-2)
195	TRINITY_DN73159_c2_g8_i5	-10.2638	AT5G56870.1	AT5G56870	beta-galactosidase 4;(source:Araport11) protein_coding BETA-GALACTOSIDASE 4 (BGAL4) BETA-GALACTOSIDASE 4 (BGAL4)	1	40.816	49	22	3	114	254	8	51	2.2	30			AT1G49820	encodes 5-methylthioribose kinase, involved in methionine cycle The mRNA is cell-to-cell mobile. protein_coding S-METHYL-5-THIORIBOSE KINASE (MTK) S-METHYL-5-THIORIBOSE KINASE (ATMTK);5-METHYLTHIORIBOSE KINASE 1 (MTK1);S-METHYL-5-THIORIBOSE KINASE (MTK)
196	TRINITY_DN70663_c1_g2_i9	10.2628	AT1G43850.2	AT1G43850	Encodes a transcriptional co-regulator of AGAMOUS, that functions with LEUNIG to repress AG in the outer floral whorls. protein_coding SEUSS (SEU) SEUSS (SEU)	4	63.918	388	102	7	1337	2404	301	682	7.98e-147	465			AT5G04990	Encodes a member of the Sad1/UNC-84 (SUN)-domain proteins: AtSUN1(At5g04990), AtSUN2(AT3G10730). SUN domain proteins are part of the cytoskeletal-nucleoskeletal bridging complexes. AtSUN1 and AtSUN2 are localized to the nuclear envelope and are present as homomers and heteromers in vivo.Encodes an outer nuclear membrane protein that anchors RanGAP1 to the nuclea
197	TRINITY_DN72327_c0_g1_i11	10.2536	AT1G04030.2	AT1G04030	eisosome protein;(source:Araport11) protein_coding	1	36.802	394	174	14	1447	2457	54	429	3e-34	137			AT1G19330	Evening-expressed key component of Sin3-HDAC complex, which bind directly to the CIRCADIAN CLOCK ASSOCIATED 1 (CCA1) and PSEUDO-RESPONSE REGULATOR 9 (PRR9) promoters and catalyze histone 3 (H3) deacetylation at the cognate regions to repress expression, allowing the declining phase of their expression at dusk. protein_coding SAP30 FUNCTION-RELATED 2 (AFR2) SAP30
198	TRINITY_DN72903_c2_g1_i13	-10.2444	AT4G32570.1	AT4G32570	TIFY domain protein 8;(source:Araport11) protein_coding TIFY DOMAIN PROTEIN 8 (TIFY8) TIFY DOMAIN PROTEIN 8 (TIFY8)	1	34.615	260	92	11	1326	2093	80	265	1.22e-21	98.6			AT1G43850	Encodes a transcriptional co-regulator of AGAMOUS, that functions with LEUNIG to repress AG in the outer floral whorls. protein_coding SEUSS (SEU) SEUSS (SEU)
199	TRINITY_DN74477_c1_g1_i2	-10.2444	no hit																AT1G03330	Small nuclear ribonucleoprotein family protein;(source:Araport11) protein_coding SM-LIKE 2 (LSM2) SM-LIKE 2 (LSM2)
200	TRINITY_DN72615_c1_g1_i21	10.2443	AT3G23280.2	AT3G23280	Encodes a ubiquitin ligase that is a novel player in ethylene signaling involved in negatively regulating apical hook curvature, with alternative splicing controlling dual targeting to the nuclear and cytoplasmic compartments. protein_coding XB3 ORTHOLOG 5 IN ARABIDOPSIS THALIANA (XBAT35) XB3 ORTHOLOG 5 IN ARABIDOPSIS THALIANA (XBAT35)	1	45.017	291	143	4	2926	3795	13	287	1.74e-70	244			AT4G27585	Encodes a stomatin-like protein that is present in a mitochondrial membrane-bound 3 MDa protein complex and is involved in the assembly of mitochondrial respiratory supercomplexes. There is an observed increase in abundance of respiratory complex III2 in SLP1 single and double knockout mutants. The protein is not redundant with Arabidopsis SLP2 (At5g54100).
201	TRINITY_DN72535_c0_g3_i2	-10.2346	AT1G12460.2	AT1G12460	Leucine-rich repeat protein kinase family protein;(source:Araport11) protein_coding	1	62.834	487	171	6	1670	3109	255	738	0	573			AT5G54100	SPFH/Band 7/PHB domain-containing membrane-associated protein family;(source:Araport11) protein_coding STOMATIN-LIKE PROTEIN 2 (SLP2) (ATSLP2);STOMATIN-LIKE PROTEIN 2 (SLP2)
202	TRINITY_DN73296_c0_g1_i8	10.2162	AT5G65260.1	AT5G65260	RNA-binding (RRM/RBD/RNP motifs) family protein;(source:Araport11) protein_coding (PABN3) (PABN3)	1	73.684	19	5	0	57	113	170	188	0.000552	37			AT1G22620	SAC domain phosphoinositide (3,5)P2 phosphatase. Colocalized with a Golgi Marker. Required for normal cell morphogenesis, cell wall synthesis, and actin organization. protein_coding SUPPRESSOR OF ACTIN 1 (SAC1) SUPPRESSOR OF ACTIN 1 (SAC1);SUPPRESSOR OF ACTIN 1 (ATSAC1)
203	TRINITY_DN75244_c5_g3_i8	10.2162	AT5G59870.1	AT5G59870	Encodes HTA6, a histone H2A protein. protein_coding HISTONE H2A 6 (HTA6) (H2A.W.6);HISTONE H2A 6 (HTA6)	1	77.778	45	10	0	1	135	89	133	3.02e-17	76.6			AT1G33410	Encodes a nucleoporin that regulates CONSTANS (CO) protein stability through affecting nuclear pore complex localization of an E3-ubiquitin ligase, HIGH EXPRESSION OF OSMOTICALLY RESPONSIVE GENES1 (HOS1), which destabilizes CO protein in the morning period. protein_coding SUPPRESSOR OF AUXIN RESISTANCE1 (SAR1) SUPPRESSOR OF AUXIN RESISTANCE1 (SAR1);ARABIDO
204	TRINITY_DN75515_c0_g1_i7	-10.2149	AT3G05680.2	AT3G05680	Encodes a splicing/methylation factor that is a homologue to the mammalian VIRILIZER, is member of a core set of mRNA m6A writer proteins and is required for N6-adenosine methylation of mRNA. Analysis of transcriptional profiles of the vir-1 mutant suggests that VIR is likely involved in regulation of gene expression, but the function of VIR is rather general than	1	46.655	1779	872	27	429	5711	1	1720	0	1412			AT1G30970	Encodes SUF4 (SUPPRESSOR of FRI 4), a putative zinc-finger-containing transcription factor that is required for delayed flowering in winter-annual Arabidopsis. suf4 mutations strongly suppress the late-flowering phenotype of FRI (FRIGIDA) mutants. suf4 mutants also show reduced H3K4 trimethylation at FLC (FLOWERING LOCUS C), a floral inhibitor. SUF4 may act to
205	TRINITY_DN73986_c2_g8_i4	10.2066	AT2G47110.2	AT2G47110	polyubiquitin gene The mRNA is cell-to-cell mobile. protein_coding UBIQUITIN 6 (UBQ6) UBIQUITIN 6 (UBQ6);RIBOSOMAL PROTEIN S27AB (RPS27AB);UBIQUITIN EXTENSION PROTEIN 6 (UBI6)	1	98.701	77	1	0	630	860	1	77	1.78e-47	157			AT1G68540	NAD(P)-binding Rossmann-fold superfamily protein;(source:Araport11) protein_coding TETRAKETIDE ALPHA-PYRONE REDUCTASE 2 (TKPR2) CINNAMOYL COA REDUCTASE-LIKE 6 (CCRL6);TETRAKETIDE ALPHA-PYRONE REDUCTASE 2 (TKPR2)
206	TRINITY_DN36805_c0_g1_i1	-10.2049	no hit																AT4G32570	TIFY domain protein 8;(source:Araport11) protein_coding TIFY DOMAIN PROTEIN 8 (TIFY8) TIFY DOMAIN PROTEIN 8 (TIFY8)
207	TRINITY_DN72587_c1_g1_i14	-10.1949	AT3G13300.2	AT3G13300	Encodes VCS (VARICOSE). Involved in mRNA decapping. VCS forms a mRNA decapping complex with DCP1 (At1g08370) and DCP2 (At5g13570). Unlike DCP2, VCS itself does not have mRNA decapping activity in vitro. DCP1, DCP2 and VCS colocalize in cytoplasmic loci, which are putative Arabidopsis mRNA processing bodies. Null mutants of DCP1, DCP2, and VCS accumulate capp	1	49.255	1141	530	22	522	3899	114	1220	0	997			AT1G21380	Encodes a member of the Arabidopsis TOL (TOM1-LIKE) family of ubiquitin binding proteins that acts redundantly in the recognition and further endocytic sorting of a PIN-FORMED (PIN)-type auxin carrier protein at the plasma membrane, modulating dynamic auxin distribution and associated growth responses. protein_coding TOM1-LIKE 3 (TOL3) TOM1-LIKE 3 (TOL3)
208	TRINITY_DN65938_c0_g1_i4	10.1874	AT3G26100.6	AT3G26100	Regulator of chromosome condensation (RCC1) family protein;(source:Araport11) protein_coding	1	79.783	460	93	0	622	2001	73	532	0	681			AT1G10950	Encodes an Arabidopsis Transmembrane nine (TMN) protein. Transmembrane nine (TM9) proteins are localized in the secretory pathway of eukaryotic cells and are involved in cell adhesion and phagocytosis. Functions in the deposition of rhamnogalacturonan II and I for cell growth. protein_coding TRANSMEMBRANE NINE 1 (TMN1) TRANSMEMBRANE NINE 1 (TMN1);EN
209	TRINITY_DN73176_c1_g1_i7	-10.1847	AT5G07810.1	AT5G07810	SNF2 domain-containing protein / helicase domain-containing protein / HNH endonuclease domain-containing protein;(source:Araport11) protein_coding	1	49.515	1133	514	13	282	3563	74	1187	0	991			AT1G06410	Encodes an enzyme putatively involved in trehalose biosynthesis. Though the protein has both trehalose-6-phosphate synthase (TPS)-like and trehalose-6-phosphate phosphatase (TPP)-like domains, neither activity has been detected in enzymatic assays nor has the protein been able to complement yeast TPS or TPP mutants. protein_coding TREHALOSE-PHOSPHATASE/SYNTHASE
210	TRINITY_DN75121_c0_g1_i8	10.1777	AT3G06650.2	AT3G06650	One of the two genes encoding subunit B of the trimeric enzyme ATP Citrate lyase protein_coding ATP-CITRATE LYASE B-1 (ACLB-1) ATP-CITRATE LYASE B-1 (ACLB-1)	1	92.763	608	44	0	158	1981	1	608	0	1137			AT5G14600	Part of complex with TRM6, plays a critical role in maintaining the stability of initiator methionyl-tRNA, embryo and endosperm development. In the complex TRM61 functions as the catalytic subunit, and TRM6 performs the role of the binding subunit protein_coding TRNA METHYLTRANSFERASE 61 (TRM61) (ATTRM61);TRNA METHYLTRANSFERASE 61 (TRM61)
211	TRINITY_DN70042_c0_g1_i2	10.1777	AT4G15030.1	AT4G15030	folate-sensitive fragile site protein;(source:Araport11) protein_coding	2	71.687	166	47	0	80	577	1	166	7.69e-83	265			AT2G47110	polyubiquitin gene The mRNA is cell-to-cell mobile. protein_coding UBIQUITIN 6 (UBQ6) UBIQUITIN 6 (UBQ6);RIBOSOMAL PROTEIN S27AB (RPS27AB);UBIQUITIN EXTENSION PROTEIN 6 (UBI6)
212	TRINITY_DN72973_c1_g1_i7	10.1777	AT1G04900.1	AT1G04900	NADH dehydrogenase ubiquinone complex I, assembly factor-like protein (DUF185);(source:Araport11) protein_coding	1	67.847	339	103	1	303	1319	108	440	4.69e-167	483			AT3G13300	Encodes VCS (VARICOSE). Involved in mRNA decapping. VCS forms a mRNA decapping complex with DCP1 (At1g08370) and DCP2 (At5g13570). Unlike DCP2, VCS itself does not have mRNA decapping activity in vitro. DCP1, DCP2 and VCS colocalize in cytoplasmic loci, which are putative Arabidopsis mRNA processing bodies. Null mutants of DCP1, DCP2, and VCS accumulate capp
213	TRINITY_DN74468_c0_g1_i13	-10.1746	AT5G57610.1	AT5G57610	kinase superfamily with octicosapeptide/Phox/Bem1p domain-containing protein;(source:Araport11) protein_coding	1	48.716	1090	335	36	304	3078	24	1054	0	777			AT2G33110	member of VAMP72 Gene Family protein_coding VESICLE-ASSOCIATED MEMBRANE PROTEIN 723 (VAMP723) VESICLE-ASSOCIATED MEMBRANE PROTEIN 723 (ATVAMP723);VESICLE-ASSOCIATED MEMBRANE PROTEIN 723 (VAMP723); (VAMP723)
214	TRINITY_DN73147_c0_g2_i6	-10.1746	AT1G02170.1	AT1G02170	Encodes a type I metacaspase. Two Arabidopsis metacaspases, AT1G02170 (MC1) and AT4G25110 (MC2) antagonistically control programmed cell death in Arabidopsis. MC1 is a positive regulator of cell death and requires conserved caspase-like putative catalytic residues for its function. MC2 negatively regulates cell death. This function is independent of the putative	1	80.769	156	30	0	66	533	124	279	8.7e-88	281			AT3G23280	Encodes a ubiquitin ligase that is a novel player in ethylene signaling involved in negatively regulating apical hook curvature, with alternative splicing controlling dual targeting to the nuclear and cytoplasmic compartments. protein_coding XB3 ORTHOLOG 5 IN ARABIDOPSIS THALIANA (XBAT35) XB3 ORTHOLOG 5 IN ARABIDOPSIS THALIANA (XBAT35)
215	TRINITY_DN68686_c1_g1_i4	10.1679	no hit																AT1G55910	member of Putative zinc transporter ZIP2 - like family protein_coding ZINC TRANSPORTER 11 PRECURSOR (ZIP11) ZINC TRANSPORTER 11 PRECURSOR (ZIP11)
216	TRINITY_DN72707_c1_g1_i13	-10.1643	AT2G19380.1	AT2G19380	RNA recognition motif (RRM)-containing protein;(source:Araport11) protein_coding	3	28.655	171	90	6	745	1161	87	257	1.25e-06	52.4
217	TRINITY_DN66554_c0_g1_i5	-10.154	AT1G03070.3	AT1G03070	Bax inhibitor-1 family protein;(source:Araport11) protein_coding LIFEGUARD 4 (LFG4) (ATLFG4);LIFEGUARD 4 (LFG4)	2	69.484	213	65	0	267	905	35	247	2.26e-92	282
218	TRINITY_DN75804_c0_g1_i2	10.1482	AT5G63960.1	AT5G63960	Encodes the catalytic subunits of DNA polymerase &#948;, which is involved in the deposition of epigenetic marks. protein_coding GIGANTEA SUPPRESSOR5 (GIS5) EMBRYO DEFECTIVE 2780 (EMB2780);GIGANTEA SUPPRESSOR5 (GIS5)	1	79.922	1021	199	3	355	3405	74	1092	0	1632
219	TRINITY_DN74177_c3_g1_i7	-10.1436	AT4G18590.1	AT4G18590	Nucleic acid-binding, OB-fold-like protein;(source:Araport11) protein_coding REPLICATION PROTEIN A 3B (RPA3B) REPLICATION PROTEIN A 3B (RPA3B)	2	50.943	106	52	0	664	981	1	106	4.4e-35	127
220	TRINITY_DN69614_c1_g3_i4	-10.1225	AT2G20580.1	AT2G20580	encoding the RPN subunits of the 26S proteasome The mRNA is cell-to-cell mobile. protein_coding 26S PROTEASOME REGULATORY SUBUNIT S2 1A (RPN1A) 26S PROTEASOME REGULATORY SUBUNIT S2 1A (RPN1A);26S PROTEASOME REGULATORY SUBUNIT S2 1A (ATRPN1A)	1	76.112	854	203	1	158	2719	39	891	0	1209
221	TRINITY_DN73728_c4_g4_i2	-10.1225	AT5G55720.1	AT5G55720	Pectin lyase-like superfamily protein;(source:Araport11) protein_coding	2	24.242	66	49	1	557	360	134	198	7.1	29.3
222	TRINITY_DN72232_c1_g1_i6	10.1181	AT1G22060.2	AT1G22060	sporulation-specific protein;(source:Araport11) protein_coding	1	40.994	905	445	17	430	2967	1	875	1.57e-149	516
223	TRINITY_DN70301_c0_g1_i7	-10.1119	AT5G55810.1	AT5G55810	encodes a bi-functional enzyme that expresses both nicotinamide-nucleotide adenylyltransferase (2.7.7.1) and nicotinate-nucleotide adenylyltransferase (2.7.7.18)activity. protein_coding NICOTINATE/NICOTINAMIDE MONONUCLEOTIDE ADENYLTRANSFERASE (NMNAT) NICOTINATE/NICOTINAMIDE MONONUCLEOTIDE ADENYLTRANSFERASE (NMNAT)	1	60.816	245	85	2	403	1137	1	234	2.37e-104	313
224	TRINITY_DN75418_c0_g2_i11	10.1079	AT2G34160.1	AT2G34160	Alba DNA/RNA-binding protein;(source:Araport11) protein_coding NVOLVED IN RRNA PROCESSING 7 (IRP7) (ALBA2);NVOLVED IN RRNA PROCESSING 7 (IRP7)	1	72.222	108	29	1	215	538	1	107	4.42e-50	163
225	TRINITY_DN74863_c0_g5_i1	10.1079	AT1G06410.3	AT1G06410	Encodes an enzyme putatively involved in trehalose biosynthesis. Though the protein has both trehalose-6-phosphate synthase (TPS)-like and trehalose-6-phosphate phosphatase (TPP)-like domains, neither activity has been detected in enzymatic assays nor has the protein been able to complement yeast TPS or TPP mutants. protein_coding TREHALOSE-PHOSPHATASE/SYNTHASE	1	70.499	461	127	4	219	1601	1	452	0	663
226	TRINITY_DN67368_c0_g1_i4	-10.1012	AT3G48470.2	AT3G48470	embryo defective 2423;(source:Araport11) protein_coding EMBRYO DEFECTIVE 2423 (EMB2423) EMBRYO DEFECTIVE 2423 (EMB2423)	1	53.27	948	411	14	241	3048	31	958	0	919
227	TRINITY_DN75100_c0_g1_i1	-10.1012	AT1G49820.1	AT1G49820	encodes 5-methylthioribose kinase, involved in methionine cycle The mRNA is cell-to-cell mobile. protein_coding S-METHYL-5-THIORIBOSE KINASE (MTK) S-METHYL-5-THIORIBOSE KINASE (ATMTK);5-METHYLTHIORIBOSE KINASE 1 (MTK1);S-METHYL-5-THIORIBOSE KINASE (MTK)	1	73.253	415	107	2	181	1413	6	420	0	651
228	TRINITY_DN134644_c0_g1_i1	-10.0904	AT1G07080.1	AT1G07080	Thioredoxin superfamily protein;(source:Araport11) protein_coding	1	58.911	202	78	3	325	915	35	236	2.49e-79	246
229	TRINITY_DN75159_c2_g3_i6	10.0873	AT4G15010.3	AT4G15010	Mitochondrial substrate carrier family protein;(source:Araport11) protein_coding	1	53.271	321	135	3	147	1085	1	314	4.73e-102	306
230	TRINITY_DN74466_c2_g3_i7	10.0873	AT2G22125.1	AT2G22125	Encodes a protein involved in cell elongation in root and anther filaments. Mutants have greater cell volumes in root tissues and have additive phenotypes with other cell expansion mutants such as those carrying mutations in COB, QUI and POM1 loci. POM2/CSI1 promotes Cellulose Synthase and microtubule co-alignment. The mRNA is cell-to-cell mobile. protein_coding	2	70.829	2074	581	10	168	6341	1	2066	0	2637
231	TRINITY_DN65205_c0_g1_i1	-10.0795	AT4G29250.1	AT4G29250	HXXXD-type acyl-transferase family protein;(source:Araport11) protein_coding	1	31.343	67	45	1	523	723	273	338	3.6	29.6
232	TRINITY_DN74623_c1_g2_i25	-10.0795	AT5G58940.4	AT5G58940	Arabidopsis thaliana calmodulin-binding receptor-like kinase mRNA The mRNA is cell-to-cell mobile. protein_coding CALMODULIN-BINDING RECEPTOR-LIKE CYTOPLASMIC KINASE 1 (CRCK1) CALMODULIN-BINDING RECEPTOR-LIKE CYTOPLASMIC KINASE 1 (CRCK1)	2	35.294	68	39	1	762	965	323	385	7.1	30.8
233	TRINITY_DN73286_c3_g7_i2	10.0769	AT1G69980.1	AT1G69980	structural polyprotein;(source:Araport11) protein_coding	1	42.157	204	86	7	133	693	4	192	3.17e-37	134
234	TRINITY_DN75460_c0_g5_i4	-10.0685	AT2G25570.3	AT2G25570	SEL1-like repeat protein involved in plasmodesmata-mediated intercellular transport. protein_coding (ISE3) (ISE3)	1	70.968	62	18	0	999	1184	102	163	7.71e-27	93.2
235	TRINITY_DN72506_c0_g4_i2	-10.0685	AT1G10290.1	AT1G10290	involved in trafficking from the trans-Golgi Network to the central vacuole. The mRNA is cell-to-cell mobile. protein_coding DYNAMIN-LIKE PROTEIN 6 (ADL6) DYNAMIN-RELATED PROTEIN 2A (DRP2A);DYNAMIN-LIKE PROTEIN 6 (ADL6)	1	72.547	805	192	8	75	2471	104	885	0	1107
236	TRINITY_DN72707_c1_g1_i18	10.0558	AT5G61190.1	AT5G61190	putative endonuclease or glycosyl hydrolase with C2H2-type zinc finger domain-containing protein;(source:Araport11) protein_coding	2	21.168	274	180	8	417	1157	241	505	8.78e-07	53.1
237	TRINITY_DN66743_c0_g1_i2	10.0558	AT2G44820.1	AT2G44820	axoneme-associated protein MST101(2) protein;(source:Araport11) protein_coding	1	48.889	135	63	3	401	799	33	163	1.48e-29	114
238	TRINITY_DN68095_c0_g1_i2	10.0558	AT1G02860.1	AT1G02860	Encodes a ubiquitin E3 ligase with RING and SPX domains that is involved in mediating immune responses and mediates degradation of PHT1s at plasma membranes. Targeted by MIR827. Ubiquitinates PHT1;3, PHT1;2, PHT1;1/AtPT1 and PHT1;4/AtPT2. protein_coding NITROGEN LIMITATION ADAPTATION (NLA) NITROGEN LIMITATION ADAPTATION (NLA); (SYG1);BENZOIC ACID HYPERSENSITI	1	61.721	337	117	3	254	1237	1	334	7.51e-142	413
239	TRINITY_DN73464_c0_g1_i15	-10.0464	AT5G04560.2	AT5G04560	Encodes a DNA glycosylase DEMETER (DME). Responsible for endosperm maternal-allele-specific hypomethylation at the MEDEA (MEA) gene. DME can excise 5-methylcytosine in vitro and when expressed in E. coli. DME establishes MEA imprinting by removing 5-methylcytosine to activate the maternal allele. protein_coding DEMETER (DME) (EMB1649);DEMETER (DME)	1	57.495	527	201	2	3253	4764	1450	1976	0	632
240	TRINITY_DN75283_c3_g4_i1	10.037	AT2G30620.2	AT2G30620	winged-helix DNA-binding transcription factor family protein;(source:Araport11) protein_coding HISTONE 1.2 (H1.2) (HON2);HISTONE 1.2 (H1.2)	1	64	25	9	0	1	75	104	128	2.7	30.4
241	TRINITY_DN71611_c0_g1_i5	10.0345	AT4G02060.2	AT4G02060	Member of the minichromosome maintenance complex, involved in DNA replication initiation. Abundant in proliferating and endocycling tissues. Localized in the nucleus during G1, S and G2 phases of the cell cycle, and are released into the cytoplasmic compartment during mitosis. Binds chromatin. protein_coding PROLIFERA (PRL) (MCM7);PROLIFERA (PRL)	2	84.51	510	78	1	3	1532	47	555	0	891
242	TRINITY_DN73671_c0_g1_i5	10.0345	AT1G48570.1	AT1G48570	zinc finger (Ran-binding) family protein;(source:Araport11) protein_coding	1	38.462	416	152	10	453	1451	60	454	2.42e-81	270
243	TRINITY_DN75257_c1_g1_i5	-10.0238	AT1G60160.1	AT1G60160	Member of the KT/KUP/HAK family of proton-coupled potassium transporters which have potential effect on cellular expansion. protein_coding K TRANSPORTER12 (KT12) K TRANSPORTER12 (KT12)	1	73.853	436	98	6	1921	3213	403	827	0	589
244	TRINITY_DN70757_c2_g7_i7	10.0237	no hit
245	TRINITY_DN69590_c4_g2_i3	10.0128	AT5G20420.1	AT5G20420	Involved in gene silencing. Locus-specific regulator of 24nt-siRNA expression, works together with CLSY1-4 as the master regulators of essentially all Pol-IV-dependent 24nt-siRNAs. protein_coding CHROMATIN REMODELING 42 (CHR42) CHROMATIN REMODELING 42 (CHR42);CLASSY2 (CLSY2)	1	46.365	729	363	12	1649	3799	541	1253	0	629
246	TRINITY_DN75077_c1_g1_i1	10.0128	AT5G08780.1	AT5G08780	winged-helix DNA-binding transcription factor family protein;(source:Araport11) protein_coding	1	38.182	55	34	0	196	360	58	112	1.17e-05	49.7
247	TRINITY_DN59471_c0_g1_i1	10.0128	AT3G07470.3	AT3G07470	DUF538 protein protein_coding	1	48.98	147	48	2	71	430	2	148	8.55e-41	140
248	TRINITY_DN75752_c2_g3_i6	10.0128	no hit
249	TRINITY_DN74810_c2_g7_i3	-10.0124	AT3G25860.1	AT3G25860	Encodes the dihydrolipoamide S-acetyltransferase subunit of the plastid Pyruvate Dehydrogenase Complex (E2). Mutant has embryo defect. protein_coding (LTA2) PLASTID E2 SUBUNIT OF PYRUVATE DECARBOXYLASE (PLE2); (LTA2)	1	77.752	427	88	2	279	1538	54	480	0	591
250	TRINITY_DN73574_c0_g1_i2	10.0018	AT4G22060.1	AT4G22060	F-box protein (DUF295);(source:Araport11) protein_coding F-BOX/DUF295 BRASSICEAE-SPECIFIC 29 (ATFDB29) F-BOX/DUF295 BRASSICEAE-SPECIFIC 29 (ATFDB29)	1	22.316	354	218	14	503	1441	13	350	6.93e-11	65.1
251	TRINITY_DN70799_c0_g1_i3	10.0018	AT2G27285.1	AT2G27285	nuclear speckle splicing regulatory-like protein (DUF2040);(source:Araport11) protein_coding	1	45.672	335	153	10	116	1093	1	315	6.44e-60	202
252	TRINITY_DN69385_c0_g1_i2	10.0018	AT3G50150.1	AT3G50150	transmembrane protein, putative (DUF247);(source:Araport11) protein_coding	1	33.26	457	260	14	334	1674	86	507	1.42e-48	179
253	TRINITY_DN75752_c2_g2_i1	10.0018	AT3G61080.1	AT3G61080	Protein kinase superfamily protein;(source:Araport11) protein_coding	1	25.197	127	80	5	2401	2760	52	170	2.5	32.7
