# Supplementary material for: Identification of a Male Sterile Candidate Gene in Lilium x formolongi and Transfer of the Gene to Easter Lily (L. longiflorum) via Hybridization
Source: Front Plant Sci. 2022 Jun 29;13:914671. doi: 10.3389/fpls.2022.914671 (PMC9277459; doi:10.3389/fpls.2022.914671)
Supplement: Supplementary file 9 [file Table_3.XLSX]

## Sheet: (1)-GO p>np (-unclassified)
	Supplementary Table 3 Genes included in the significantly enriched GO analysis performed on the A. thaliana basis where DETs identified in the anthers (collected from the bud size, 11-14mm) of pollen sterile (np) and fertile (p) plants were replaced with orthologous genes in A. thaliana.
		(abbreviation of GO terms)	FO,Floral organ development; RST,Reproductive structure development; RS,reproductive system development; DP, developmental process involved in reproduction; RP, reproductive process; R, reproduction
	GO terms	Gene ID	Mapped ID	Gene Name; Gene Symbol	PANTHER Family/Subfamily	PANTHER Protein Class	Species
	p>np
	Biological process
1	FO, RST, RS, DP, RP, R	ARATH|TAIR=locus=2029137|UniProtKB=Q8W234	AT1G43850	Transcriptional corepressor SEUSS;SEU;ortholog	TRANSCRIPTIONAL COREPRESSOR SEUSS (PTHR10378:SF24)	transcription cofactor(PC00217)	Arabidopsis thaliana
2	RST, RS, DP, RP, R	ARATH|TAIR=locus=505006173|UniProtKB=Q6IDB6	AT1G48175	tRNA-specific adenosine deaminase TAD2;TAD2;ortholog	TRNA-SPECIFIC ADENOSINE DEAMINASE 2 (PTHR11079:SF149)	deaminase(PC00088)	Arabidopsis thaliana
3	RST, RS, DP, RP, R	ARATH|TAIR=locus=2195688|UniProtKB=O80739	AT1G60160	Putative potassium transporter 12;POT12;ortholog	POTASSIUM TRANSPORTER 12-RELATED (PTHR30540:SF4)	transporter(PC00227)	Arabidopsis thaliana
4	FO, RST, RS, DP, RP, R	ARATH|TAIR=locus=2196000|UniProtKB=Q2LAE1	AT1G77300	Histone-lysine N-methyltransferase ASHH2;ASHH2;ortholog	HISTONE-LYSINE N-METHYLTRANSFERASE CG1716-RELATED (PTHR22884:SF413)		Arabidopsis thaliana
5	FO, RST, RS, DP, RP, R	ARATH|EnsemblGenome=AT2G23140|UniProtKB=O22193	AT2G23140	U-box domain-containing protein 4;PUB4;ortholog	U-BOX DOMAIN-CONTAINING PROTEIN 4 (PTHR23315:SF7)	ubiquitin-protein ligase(PC00234)	Arabidopsis thaliana
6	RST, RS, DP, RP, R	ARATH|TAIR=locus=2078082|UniProtKB=F4J8G7	AT3G05680	Protein virilizer homolog;VIR;ortholog	PROTEIN VIRILIZER HOMOLOG (PTHR23185:SF0)		Arabidopsis thaliana
7	FO, RST, RS, DP, RP, R	ARATH|TAIR=locus=2087780|UniProtKB=Q7X9V2	AT3G12810	Protein PHOTOPERIOD-INDEPENDENT EARLY FLOWERING 1;PIE1;ortholog	HELICASE SRCAP (PTHR45685:SF1)		Arabidopsis thaliana
8	RST, RS, DP, RP, R	ARATH|TAIR=locus=2088165|UniProtKB=Q9LTT8	AT3G13300	Enhancer of mRNA-decapping protein 4;VCS;ortholog	ENHANCER OF MRNA-DECAPPING PROTEIN 4 (PTHR15598:SF5)	mRNA capping factor(PC00145)	Arabidopsis thaliana
9	RP, R	ARATH|TAIR=locus=2094083|UniProtKB=Q0PCS3	AT3G19210	Protein CHROMATIN REMODELING 25;CHR25;ortholog	DNA EXCISION REPAIR PROTEIN ERCC-6-RELATED (PTHR45629:SF7)	damaged DNA-binding protein(PC00086)	Arabidopsis thaliana
10	RST, RS, DP, RP, R	ARATH|TAIR=locus=2090414|UniProtKB=Q94CE5	AT3G22200	Gamma-aminobutyrate transaminase POP2, mitochondrial;POP2;ortholog	ADENOSYLMETHIONINE-8-AMINO-7-OXONONANOATE AMINOTRANSFERASE (PTHR42684:SF3)	transaminase(PC00216)	Arabidopsis thaliana
11	FO, RST, RS, DP, RP, R	ARATH|TAIR=locus=2088957|UniProtKB=Q9LSI7	AT3G28470	Transcription factor MYB35;MYB35;ortholog	F14D16.11-RELATED (PTHR47994:SF5)		Arabidopsis thaliana
12	RST, RS, DP, RP, R	ARATH|TAIR=locus=504955643|UniProtKB=F4JF17	AT3G48470	Embryo defective 2423;EMB2423;ortholog	TELOMERE LENGTH REGULATION PROTEIN TEL2 HOMOLOG (PTHR15830:SF10)		Arabidopsis thaliana
13	FO, RST, RS, DP, RP, R	ARATH|TAIR=locus=504955576|UniProtKB=Q8L649	AT3G63530	E3 ubiquitin-protein ligase BIG BROTHER;BB;ortholog	E3 UBIQUITIN-PROTEIN LIGASE BIG BROTHER-RELATED (PTHR46400:SF5)		Arabidopsis thaliana
14	FO, RST, RS, DP, RP, R	ARATH|TAIR=locus=2119627|UniProtKB=O65418	AT4G21530	Anaphase-promoting complex subunit 4;APC4;ortholog	ANAPHASE-PROMOTING COMPLEX SUBUNIT 4 (PTHR13260:SF0)		Arabidopsis thaliana
15	RST, RS, DP, RP, R	ARATH|TAIR=locus=2184432|UniProtKB=Q8LK56	AT5G04560	Transcriptional activator DEMETER;DME;ortholog	DEMETER-LIKE PROTEIN 3-RELATED (PTHR46213:SF24)	DNA-binding transcription factor(PC00218)	Arabidopsis thaliana
16	RP, R	ARATH|TAIR=locus=2175354|UniProtKB=Q9FF75	AT5G04990	SUN domain-containing protein 1;SUN1;ortholog	SAD1 AND UNC84 DOMAIN-CONTAINING 1-RELATED (PTHR12911:SF8)	non-motor microtubule binding protein(PC00166)	Arabidopsis thaliana
17	FO, RST, RS, DP, RP, R	ARATH|TAIR=locus=2178292|UniProtKB=Q9XER9	AT5G23150	ENHANCER OF AG-4 protein 2;HUA2;ortholog	JIL-1 ANCHORING AND STABILIZING PROTEIN, ISOFORM A (PTHR12550:SF70)	transcription cofactor(PC00217)	Arabidopsis thaliana
18	DP, RP, R	ARATH|EnsemblGenome=AT5G55810|UniProtKB=F4K687	AT5G55810	Nicotinamide/nicotinic acid mononucleotide adenylyltransferase;NMNAT;ortholog	NICOTINAMIDE-NUCLEOTIDE ADENYLYLTRANSFERASE (PTHR12039:SF0)	nucleotidyltransferase(PC00174)	Arabidopsis thaliana
	Molecular function
1	protein binding	ARATH|TAIR=locus=2175354|UniProtKB=Q9FF75	AT5G04990	SUN domain-containing protein 1;SUN1;ortholog	SAD1 AND UNC84 DOMAIN-CONTAINING 1-RELATED (PTHR12911:SF8)	non-motor microtubule binding protein(PC00166)	Arabidopsis thaliana
2	protein binding	ARATH|TAIR=locus=2152840|UniProtKB=F4K2C1	AT5G06120	ARM repeat superfamily protein;At5g06120;ortholog	EXPORTIN 7 (PTHR12596:SF2)	transporter(PC00227)	Arabidopsis thaliana
3	protein binding	ARATH|TAIR=locus=2078082|UniProtKB=F4J8G7	AT3G05680	Protein virilizer homolog;VIR;ortholog	PROTEIN VIRILIZER HOMOLOG (PTHR23185:SF0)		Arabidopsis thaliana
4	protein binding	ARATH|TAIR=locus=2012753|UniProtKB=Q9SY59	AT1G10170	NF-X1-type zinc finger protein NFXL1;NFXL1;ortholog	TRANSCRIPTIONAL REPRESSOR NF-X1 (PTHR12360:SF12)	zinc finger transcription factor(PC00244)	Arabidopsis thaliana
5	protein binding	ARATH|TAIR=locus=2204798|UniProtKB=Q7XJE6	AT1G02170	Metacaspase-1;AMC1;ortholog	METACASPASE-1 (PTHR48104:SF30)		Arabidopsis thaliana
6	protein binding	ARATH|TAIR=locus=2079621|UniProtKB=Q9SRR0	AT3G07560	Peroxisomal membrane protein 13;PEX13;ortholog	PEROXISOMAL MEMBRANE PROTEIN PEX13 (PTHR19332:SF1)	primary active transporter(PC00068)	Arabidopsis thaliana
7	protein binding	ARATH|TAIR=locus=2125731|UniProtKB=Q84MB2	AT4G32570	Protein TIFY 8;TIFY8;ortholog	PROTEIN TIFY 8 (PTHR33077:SF8)		Arabidopsis thaliana
8	protein binding	ARATH|TAIR=locus=2007253|UniProtKB=Q9C6D2	AT1G49820	Methylthioribose kinase;MTK;ortholog	METHYLTHIORIBOSE KINASE (PTHR34273:SF2)	kinase(PC00137)	Arabidopsis thaliana
9	protein binding	ARATH|TAIR=locus=2029137|UniProtKB=Q8W234	AT1G43850	Transcriptional corepressor SEUSS;SEU;ortholog	TRANSCRIPTIONAL COREPRESSOR SEUSS (PTHR10378:SF24)	transcription cofactor(PC00217)	Arabidopsis thaliana
10	protein binding	ARATH|TAIR=locus=2088165|UniProtKB=Q9LTT8	AT3G13300	Enhancer of mRNA-decapping protein 4;VCS;ortholog	ENHANCER OF MRNA-DECAPPING PROTEIN 4 (PTHR15598:SF5)	mRNA capping factor(PC00145)	Arabidopsis thaliana
11	protein binding	ARATH|TAIR=locus=2094083|UniProtKB=Q0PCS3	AT3G19210	Protein CHROMATIN REMODELING 25;CHR25;ortholog	DNA EXCISION REPAIR PROTEIN ERCC-6-RELATED (PTHR45629:SF7)	damaged DNA-binding protein(PC00086)	Arabidopsis thaliana
12	protein binding	ARATH|TAIR=locus=2043172|UniProtKB=Q8L7W3	AT2G29210	At2g29210/F16P2.41;At2g29210;ortholog	SERINE/ARGININE REPETITIVE MATRIX PROTEIN 1 (PTHR23148:SF0)	RNA processing factor(PC00147)	Arabidopsis thaliana
13	protein binding	ARATH|TAIR=locus=2033661|UniProtKB=A0A1P8AUY4	AT1G67120	Midasin;MDN1;ortholog	MIDASIN (PTHR48103:SF2)		Arabidopsis thaliana
14	protein binding	ARATH|EnsemblGenome=AT5G02560|UniProtKB=Q9LZ46	AT5G02560	Probable histone H2A.4;At5g02560;ortholog	HISTONE H2A.4-RELATED (PTHR23430:SF314)	chromatin/chromatin-binding, or -regulatory protein(PC00077)	Arabidopsis thaliana
15	protein binding	ARATH|TAIR=locus=2012763|UniProtKB=Q9SE83	AT1G10290	Dynamin-2A;DRP2A;ortholog	DYNAMIN-2A (PTHR11566:SF206)	membrane traffic protein(PC00150)	Arabidopsis thaliana
16	protein binding	ARATH|TAIR=locus=2016452|UniProtKB=F4HP43	AT1G19330	Histone deacetylase complex subunit;At1g19330;ortholog	HISTONE DEACETYLASE COMPLEX SUBUNIT (PTHR13286:SF6)	chromatin/chromatin-binding, or -regulatory protein(PC00077)	Arabidopsis thaliana
17	protein binding	ARATH|TAIR=locus=2159223|UniProtKB=P29402	AT5G61790	Calnexin homolog 1;CNX1;ortholog	CALNEXIN 14D-RELATED (PTHR11073:SF1)	chaperone(PC00072)	Arabidopsis thaliana
18	protein binding	ARATH|TAIR=locus=2114980|UniProtKB=Q94C32	AT4G37280	Protein MRG1;MRG1;ortholog	MRG DOMAIN-CONTAINING PROTEIN (PTHR10880:SF15)	chromatin/chromatin-binding, or -regulatory protein(PC00077)	Arabidopsis thaliana
19	protein binding	ARATH|TAIR=locus=2154563|UniProtKB=Q9FIL7	AT5G58940	Calmodulin-binding receptor-like cytoplasmic kinase 1;CRCK1;ortholog	CALMODULIN-BINDING RECEPTOR-LIKE CYTOPLASMIC KINASE 1 (PTHR45974:SF26)	transmembrane signal receptor(PC00197)	Arabidopsis thaliana
20	protein binding	ARATH|TAIR=locus=504955737|UniProtKB=Q9ASW4	AT3G21215	AT3G21215 protein;At3g21215;ortholog	RRM DOMAIN-CONTAINING PROTEIN (PTHR10501:SF49)	RNA splicing factor(PC00148)	Arabidopsis thaliana
21	protein binding	ARATH|TAIR=locus=2064342|UniProtKB=O04342	AT2G30530	At2g30530/T6B20.12;At2g30530;ortholog	RRNA BIOGENESIS PROTEIN RRP36-LIKE (PTHR31016:SF22)		Arabidopsis thaliana
22	protein binding	ARATH|TAIR=locus=2046016|UniProtKB=Q9SIV2	AT2G20580	26S proteasome non-ATPase regulatory subunit 2 homolog A;RPN1A;ortholog	26S PROTEASOME NON-ATPASE REGULATORY SUBUNIT 2 (PTHR10943:SF1)	protease(PC00190)	Arabidopsis thaliana
23	protein binding	ARATH|TAIR=locus=504955643|UniProtKB=F4JF17	AT3G48470	Embryo defective 2423;EMB2423;ortholog	TELOMERE LENGTH REGULATION PROTEIN TEL2 HOMOLOG (PTHR15830:SF10)		Arabidopsis thaliana
24	protein binding	ARATH|TAIR=locus=2087477|UniProtKB=Q8L748	AT3G14120	Nuclear pore complex protein NUP107;NUP107;ortholog	NUCLEAR PORE COMPLEX PROTEIN NUP107 (PTHR13003:SF2)	transporter(PC00227)	Arabidopsis thaliana
25	protein binding	ARATH|TAIR=locus=2121060|UniProtKB=Q9SZL8	AT4G38180	Protein FAR1-RELATED SEQUENCE 5;FRS5;ortholog	PROTEIN FAR1-RELATED SEQUENCE 5 (PTHR31669:SF179)		Arabidopsis thaliana
26	protein binding	ARATH|TAIR=locus=504955576|UniProtKB=Q8L649	AT3G63530	E3 ubiquitin-protein ligase BIG BROTHER;BB;ortholog	E3 UBIQUITIN-PROTEIN LIGASE BIG BROTHER-RELATED (PTHR46400:SF5)		Arabidopsis thaliana
27	protein binding	ARATH|TAIR=locus=505006173|UniProtKB=Q6IDB6	AT1G48175	tRNA-specific adenosine deaminase TAD2;TAD2;ortholog	TRNA-SPECIFIC ADENOSINE DEAMINASE 2 (PTHR11079:SF149)	deaminase(PC00088)	Arabidopsis thaliana
28	protein binding	ARATH|TAIR=locus=2044450|UniProtKB=P20649	AT2G18960	ATPase 1, plasma membrane-type;AHA1;ortholog	ATPASE 1, PLASMA MEMBRANE-TYPE (PTHR42861:SF134)	primary active transporter(PC00068)	Arabidopsis thaliana
29	protein binding	ARATH|TAIR=locus=2088957|UniProtKB=Q9LSI7	AT3G28470	Transcription factor MYB35;MYB35;ortholog	F14D16.11-RELATED (PTHR47994:SF5)		Arabidopsis thaliana
30	protein binding	ARATH|TAIR=locus=2034725|UniProtKB=C0LGE4	AT1G12460	Probable LRR receptor-like serine/threonine-protein kinase At1g12460;At1g12460;ortholog	F16P17.10 PROTEIN (PTHR48010:SF44)		Arabidopsis thaliana
	p<np
1	gene expression	ARATH|TAIR=locus=2097119|UniProtKB=Q680P8	AT4G33865	40S ribosomal protein S29;RPS29C;ortholog	40S RIBOSOMAL PROTEIN S29 (PTHR12010:SF24)	ribosomal protein(PC00202)	Arabidopsis thaliana
2	gene expression	ARATH|TAIR=locus=2014480|UniProtKB=Q1H595	AT1G03330	Sm-like protein LSM2;LSM2;ortholog	U6 SNRNA-ASSOCIATED SM-LIKE PROTEIN LSM2 (PTHR13829:SF2)	RNA splicing factor(PC00148)	Arabidopsis thaliana
3	gene expression	ARATH|TAIR=locus=2206330|UniProtKB=A8MS85	AT1G65440	Transcription elongation factor SPT6 homolog;SPT6;ortholog	TRANSCRIPTION ELONGATION FACTOR SPT6 (PTHR10145:SF6)	general transcription factor(PC00259)	Arabidopsis thaliana
4	gene expression	ARATH|TAIR=locus=2052120|UniProtKB=Q9SK22	AT2G09990	40S ribosomal protein S16-1;RPS16A;ortholog	RIBOSOMAL PROTEIN S16 (PTHR21569:SF16)	ribosomal protein(PC00202)	Arabidopsis thaliana
5	gene expression	ARATH|TAIR=locus=2222682|UniProtKB=Q84K50	AT5G14600	tRNA (adenine(58)-N(1))-methyltransferase;At5g14600;ortholog	TRNA (ADENINE(58)-N(1))-METHYLTRANSFERASE CATALYTIC SUBUNIT TRMT61A (PTHR12133:SF2)	RNA methyltransferase(PC00033)	Arabidopsis thaliana
6	gene expression	ARATH|TAIR=locus=504954643|UniProtKB=P50546	ATCG00190	DNA-directed RNA polymerase subunit beta;rpoB;ortholog	DNA-DIRECTED RNA POLYMERASE SUBUNIT BETA (PTHR20856:SF20)	DNA-directed RNA polymerase(PC00019)	Arabidopsis thaliana
7	gene expression	ARATH|TAIR=locus=2141000|UniProtKB=Q0WMZ7	AT4G17840	At4g17840;At4g17840;ortholog	IG-LIKE DOMAIN-CONTAINING PROTEIN (PTHR36736:SF2)		Arabidopsis thaliana
8	gene expression	ARATH|TAIR=locus=2063099|UniProtKB=F4IH25	AT2G40360	Ribosome biogenesis protein BOP1 homolog;BOP1;ortholog	RIBOSOME BIOGENESIS PROTEIN BOP1 (PTHR17605:SF0)	ribosomal protein(PC00202)	Arabidopsis thaliana
9	gene expression	ARATH|EnsemblGenome=AT5G13480|UniProtKB=Q6NLV4	AT5G13480	Flowering time control protein FY;FY;ortholog	PRE-MRNA 3' END PROCESSING PROTEIN WDR33 (PTHR22836:SF0)	RNA processing factor(PC00147)	Arabidopsis thaliana
10	gene expression	ARATH|TAIR=locus=2017879|UniProtKB=F4HQA1	AT1G79730	Protein PAF1 homolog;VIP2;ortholog	RNA POLYMERASE II-ASSOCIATED FACTOR 1 HOMOLOG (PTHR23188:SF12)		Arabidopsis thaliana
11	gene expression	ARATH|TAIR=locus=2011826|UniProtKB=F4I526	AT1G56310	Polynucleotidyl transferase, ribonuclease H-like superfamily protein;At1g56310;ortholog	EXONUCLEASE 3'-5' DOMAIN-CONTAINING PROTEIN 2 (PTHR13620:SF104)		Arabidopsis thaliana
12	gene expression	ARATH|TAIR=locus=2178292|UniProtKB=Q9XER9	AT5G23150	ENHANCER OF AG-4 protein 2;HUA2;ortholog	JIL-1 ANCHORING AND STABILIZING PROTEIN, ISOFORM A (PTHR12550:SF70)	transcription cofactor(PC00217)	Arabidopsis thaliana
13	gene expression	ARATH|TAIR=locus=2011851|UniProtKB=Q93ZX4	AT1G56290	CwfJ-like family protein;At1g56290;ortholog	CWF19-LIKE PROTEIN 2 (PTHR12072:SF5)		Arabidopsis thaliana
14	gene expression	ARATH|TAIR=locus=2118289|UniProtKB=Q9M0E2	AT4G29410	60S ribosomal protein L28-2;RPL28C;ortholog	60S RIBOSOMAL PROTEIN L28-2 (PTHR10544:SF7)	ribosomal protein(PC00202)	Arabidopsis thaliana
15	gene expression	ARATH|TAIR=locus=2076081|UniProtKB=P29197	AT3G23990	Chaperonin CPN60, mitochondrial;CPN60;ortholog	60 KDA HEAT SHOCK PROTEIN, MITOCHONDRIAL (PTHR45633:SF3)		Arabidopsis thaliana
