# Supplementary material for: Identification of a Male Sterile Candidate Gene in Lilium x formolongi and Transfer of the Gene to Easter Lily (L. longiflorum) via Hybridization
Source: Front Plant Sci. 2022 Jun 29;13:914671. doi: 10.3389/fpls.2022.914671 (PMC9277459; doi:10.3389/fpls.2022.914671)
Supplement: Supplementary file 10 [file Table_4.XLSX]

## Sheet: ユリ塩基比較表
Supplementary Table 4 Bases at the polymorphic sites of Lilium TDF1 genes among L. × formolongi, L. longiflorum cv. 'Hinomoto', L. formosanum, and Oriental hybrid lily, cv. 'Siberia'
	#1	#2
	58^59-in	107~-del
L. × formolongi-TDF1	-	CACTCTCTCTCTCTCTCTCTCTCTCTCTCTCTCTCTCTCTCTCTCTCTCTCTCTCTCTCTCTCTCTCTCTCTCTCTCTCTCTCTCTCTCTCTCTCTCTCTCT
L. formosanum-TDF1	-	CACTCTCTCTCTCTCT--------------------------------------------------------------------------------------
L. longiflorum-TDF1a	-	--CTCTCTCT--------------------------------------------------------------------------------------------
L. longiflorum-TDF1b	-	--CTCTCTCTCTCTCT--------------------------------------------------------------------------------------
OH-Siberia-TDF1a	C	--CTCT------------------------------------------------------------------------------------------------
OH-Siberia-TDF1b	C	------------------------------------------------------------------------------------------------------
	#3			#4	#5	#6	#7	#8	#9	#10		#11	#12	#13	#14
	209~-sub			242~-sub	246-sub	283-sub	307-sub	361-sub	425-sub	447^448-in		457-del	498~-sub	536-sub	590-sub
L. × formolongi-TDF1	CTCTCTCTCTCTCTCTCT			TCT	A	A	A	T	G	--		G	GCA	C	A
L. formosanum-TDF1	CTCTCTCTCTCTCTCTCT			TCT	A	A	A	T	G	--		G	GCA	C	A
L. longiflorum-TDF1a	CTCTCTCTCTCTCTCTCT			TCT	T	A	A	T	G	TT		G	ACA	T	C
L. longiflorum-TDF1b	ATCTCATAGAGGTCCGTA			ATA	A	A	A	T	G	T-		G	ACA	T	C
OH-Siberia-TDF1a	------------------			TCT	T	G	T	C	T	A-		-	GCT	T	C
OH-Siberia-TDF1b	------------------			TCT	T	G	T	C	T	--		-	GCT	T	C
	#15	#16	#17	#18	#19	#20	#21	#22	#23	#24	#25	#26	#27	#28	#29
	594-sub	605-sub	647-sub	655-sub	669-sub	687~-sub	691-sub	710~-sub	714-sub	743-sub	747-sub	771~-del	794~-del	809~-sub	813-sub
L. × formolongi-TDF1	C	A	T	G	T	AT	A	GG	A	C	C	CA	TGTTAT	TT	A
L. formosanum-TDF1	A	A	T	G	T	AT	A	GG	A	C	C	CA	TGTTAT	TT	A
L. longiflorum-TDF1a	C	A	T	T	T	AT	A	GA	G	C	A	CA	TGTTAT	AT	G
L. longiflorum-TDF1b	C	A	T	T	T	AT	A	GA	G	C	A	CA	TGTTAT	AA	G
OH-Siberia-TDF1a	C	G	C	T	A	CA	G	AG	G	T	C	--	------	TC	G
OH-Siberia-TDF1b	C	G	C	T	A	CA	G	AG	G	T	C	--	------	TC	G
	#30		#31	#32	#33	#34	#35	#36	#37		#38	#39	#40	#41	#42
	820^821-in		821-sub	836-sub	842-sub	850-sub	856-del	869~-sub	876~-del		909-sub	923~-sub	927~-sub	932~-sub	940-sub
L. × formolongi-TDF1	---		A	T	G	A	T	CCC	TGACCGTAATG		A	AT	TT	TCA	T
L. formosanum-TDF1	---		A	T	G	A	-	CCC	TGACCGTAATG		A	AT	TT	TCA	T
L. longiflorum-TDF1a	---		A	T	A	G	T	ACT	TGACCGTAATG		A	AT	TT	TCA	A
L. longiflorum-TDF1b	---		A	T	A	G	T	ACT	TGACCGTAATG		A	AT	TT	TCA	A
OH-Siberia-TDF1a	GGG		G	C	A	G	T	ACT	---------		G	TG	AA	CCC	A
OH-Siberia-TDF1b	GGG		G	C	A	G	T	ACT	---------		G	TG	AA	CCC	A
	#43	#44	#45		#46	#47	#48	#49	#50	#51	#52	#53	#54		#55
	953-sub	962~-sub	968~-del		983-sub	986~-sub	993^994-in	994~-sub	1034-sub	1040-sub	1047-sub	1058-sub	1062^1063-in		1073-sub
L. × formolongi-TDF1	G	TAAC	TCAAATTTTG		A	TAT	------	TTG	T	A	C	A	--		G
L. formosanum-TDF1	G	TAAC	TCAAATTTTG		A	TAT	------	TTG	T	A	C	A	--		G
L. longiflorum-TDF1a	G	TAAC	----------		A	CAC	------	CTG	C	C	C	C	--		T
L. longiflorum-TDF1b	G	TAAC	----------		A	CAC	------	CTG	C	C	C	C	--		G
OH-Siberia-TDF1a	C	GCAT	TCAAATTTTG		G	TAC	TTCCTC	CTA	A	A	T	A	TC		G
OH-Siberia-TDF1b	C	GCAT	TCAAATTTTG		G	TAC	TTCCTC	CTA	A	A	T	A	TC		G
	#56		#57		#58	#59	#60	#61	#62		#63		#64	#65	#66
	1092~-sub		1121~-sub		1136-sub	1142-sub	1149-sub	1156-sub	1189~-sub		1195^1196-in		1229-sub	1237-sub	1242-sub
L. × formolongi-TDF1	GT		GA		G	G	C	T	GG		--		C	A	C
L. formosanum-TDF1	GT		GA		G	G	C	T	GG		--		C	A	C
L. longiflorum-TDF1a	TT		GA		G	G	C	T	GG		--		C	A	C
L. longiflorum-TDF1b	GT		GA		G	G	C	T	GG		--		C	A	C
OH-Siberia-TDF1a	TA		T-		T	A	T	A	CA		TG		T	C	G
OH-Siberia-TDF1b	TA		T-		T	A	T	A	CA		TG		T	C	G
	#67		#68	#69	#70	#71	#72	#73		#74	#75	#76	#77	#78
	1246~-sub		1258-sub	1295-sub	1314-sub	1319-sub	1494-sub	1550~-sub		1157-sub	1581-sub	1641-sub	1646-sub	1707~-sub
L. × formolongi-TDF1	TTG		C	T	C	C	C	GGCA		G	C	T	A	GCC
L. formosanum-TDF1	TTG		C	T	C	C	C	GGCA		G	C	T	A	GCC
L. longiflorum-TDF1a	TTT		C	A	C	C	C	GGCA		G	C	T	A	GCC
L. longiflorum-TDF1b	TTG		C	A	A	C	A	GGCA		G	A	A	T	GCT
OH-Siberia-TDF1a	GTG		G	A	C	G	C	AACG		A	C	T	T	TCA
OH-Siberia-TDF1b	GTG		G	A	C	G	C	AACG		A	C	T	T	TCA
	#79	#80	#81	#82	#83	#84	#85	#86	#87	#88	#89		#90		#91
	1745-sub	1784-sub	1796-sub	1809-sub	1837-sub	1893-sub	1998-sub	2004-sub	2018-sub	2045-sub	2060~-sub		2072~-sub		2095-sub
L. × formolongi-TDF1	G	T	T	G	A	A	C	T	C	G	CGA		GTATC		A
L. formosanum-TDF1	G	T	T	G	A	A	C	T	C	G	CGA		GTATC		A
L. longiflorum-TDF1a	G	T	T	G	T	C	C	T	C	G	TGA		GTATC		A
L. longiflorum-TDF1b	G	C	T	G	T	C	C	T	C	G	TGA		GTATC		A
OH-Siberia-TDF1a	T	T	A	A	T	C	T	G	A	A	TGG		ATTT-		G
OH-Siberia-TDF1b	T	T	A	A	T	C	T	G	A	A	TGG		ATTT-		G
	#92	#93		#94	#95	#96	#97
	2117-sub	2124~-del		2137-sub	2180-sub	2185-sub	2206-sub
L. × formolongi-TDF1	A	CGAAATTTTCCCT		G	T	T	T
L. formosanum-TDF1	A	CGAAATTTTCCCT		G	T	T	T
L. longiflorum-TDF1a	A	CGAAATTTTCCCT		G	G	T	C
L. longiflorum-TDF1b	A	CGAAATTTTCCCT		G	G	T	C
OH-Siberia-TDF1a	C	-------------		A	G	A	C
OH-Siberia-TDF1b	C	-------------		A	G	A	C
